# Supplementary material for: Development of cellulose-based polymeric structures using dual functional ionic liquids
Source: Royal Society of Chemistry journal article supplement (doi:10.1039/d1ra03204f), 2021-01-01
Supplement: d1ra03204f1.pdf [file d1ra03204f1.pdf]

## Supporting information

### Development of cellulose-based polymeric structures using dual functional ionic liquids

Joana Galamba<sup>a</sup>, Vítor D. Alves<sup>b</sup>, Noémi Jordão<sup>a\*</sup>, Luísa A. Neves<sup>a\*</sup>

---

<sup>a</sup> LAQV-REQUIMTE, Chemistry Department, Nova School of Science and Technology | FCT NOVA, Universidade NOVA de Lisboa, Campus de Caparica, 2829-516 Caparica, Portugal

<sup>b</sup> LEAF, Linking Landscape, Environment, Agriculture and Food, Instituto Superior de Agronomia, Universidade de Lisboa, Tapada da Ajuda, 1349-017 Lisboa, Portugal

## Table of Contents

|                                                          |    |
|----------------------------------------------------------|----|
| 1. Synthesis and structural characterization of ILs..... | 3  |
| 2. ATR-FTIR spectroscopy.....                            | 9  |
| 3. Differential Scanning Calorimetry (DSC).....          | 12 |
| 4. Thermogravimetric Analysis.....                       | 21 |

# 1. Synthesis and structural characterization of ILs

**[BE][OAc]** Yellow viscous liquid (51.54 g, 98%).  $^1\text{H}$  NMR (400.13 MHz, DMSO- $d_6$ , 25°C)  $\delta$  = 7.58 (d,  $J$  = 7.16 Hz 2H), 7.54 – 7.47 (m, 3H), 7.26 (d,  $J$  = 8.04 Hz, 2H), 6.83 (d,  $J$  = 8.00 Hz, 2H), 4.68–4.64 (m, 2H), 4.15–4.11 (m, 2H), 4.07–4.05 (m, 2H), 3.95–3.69 (m, 2H, overlap with  $\text{H}_2\text{O}$  signal), 3.62–3.54 (m, 2H), 3.03 (s, 6H), 1.70–1.64 (m, 2H), 1.63–1.57 (m, 3H), 1.33–1.23 (m, 6H), 0.70–0.62 (m, 9H) ppm.  $^{13}\text{C}$  NMR (APT) (100.61 MHz, DMSO- $d_6$ , 25°C)  $\delta$  = 172.6, 156.0, 141.5, 133.2, 130.2, 128.8, 128.2, 126.9, 113.6, 68.8, 67.4, 66.6, 63.9, 62.5, 56.3, 49.7, 37.6, 32.0, 31.5, 25.4 ppm. Anal. Calcd (%) for  $\text{C}_{29}\text{H}_{45}\text{NO}_4 \cdot 3.7\text{H}_2\text{O}$ : C 64.70, H 9.81, N 2.60; found: C 64.54, H 9.85, N 2.69.

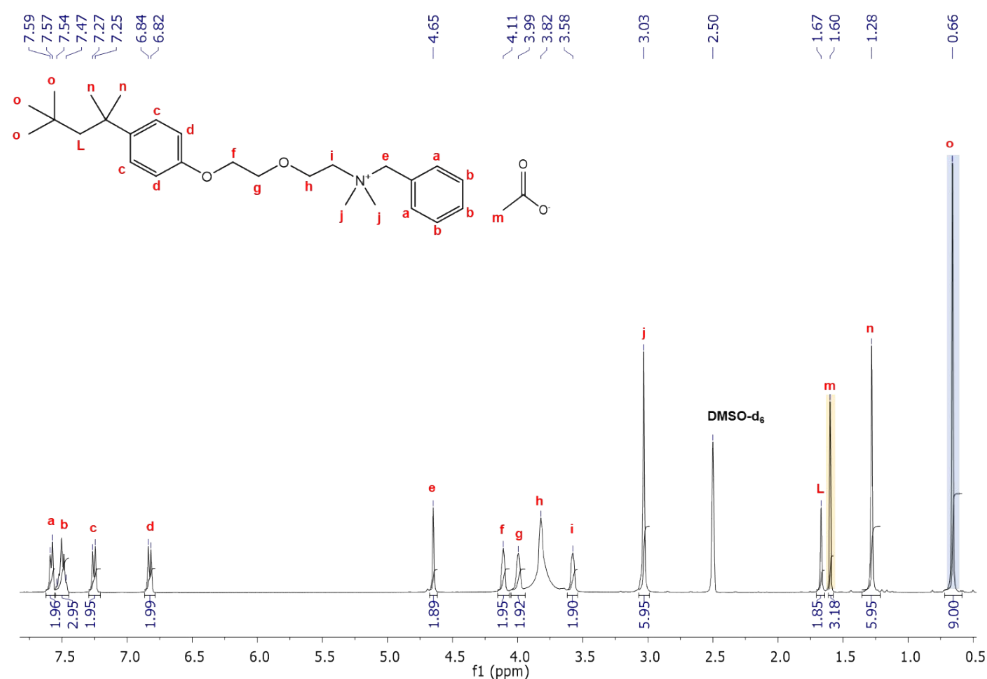

SI-Figure 1.  $^1\text{H}$  NMR (400.13 MHz, DMSO- $d_6$ , 25°C) of [BE][OAc].

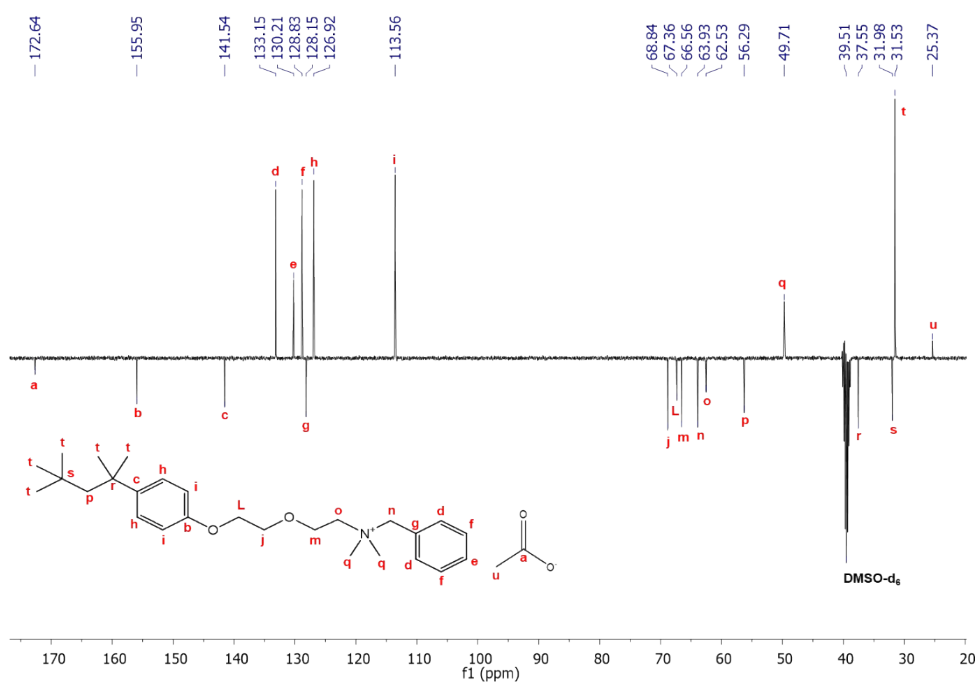

SI-Figure 2.  $^{13}\text{C}$  NMR APT (100.61 MHz, DMSO- $d_6$ , 25°C) of [BE][OAc].

**[BE][OPr]**: Yellow viscous liquid (53.11 g, 98%).  $^1\text{H}$  NMR (400.13 MHz, DMSO- $d_6$ , 25°C)  $\delta$  = 7.58 (d,  $J$  = 7.24 Hz, 2H), 7.54 – 7.47 (m, 3H), 7.25 (d,  $J$  = 7.92 Hz, 2H), 6.83 (d,  $J$  = 7.84 Hz, 2H), 4.68-4.64 (m, 2H), 4.15-4.08 (m, 2H), 4.04-3.95 (m, 2H), 3.87-3.78 (m, 2H), 3.66-3.46 (m, 2H, overlap with  $\text{H}_2\text{O}$  signal), 3.03 (s, 6H), 1.83 – 1.78 (m, 2H), 1.71-1.63 (m, 2H), 1.28 (s, 6H), 0.87 (t,  $J$  = 7.56 Hz, 3H), 0.69-0.62 (s, 9H) ppm.  $^{13}\text{C}$  NMR (APT) (100.61 MHz, DMSO- $d_6$ , 25°C)  $\delta$  = 175.9, 156.0, 141.6, 133.2, 130.2, 128.9, 128.2, 126.9, 113.6, 68.9, 67.4, 66.6, 64.0, 62.5, 56.3, 49.7, 37.6, 32.0, 31.5, 31.4, 11.4 ppm. Anal. Calcd (%) for  $\text{C}_{30}\text{H}_{47}\text{NO}_4 \cdot 4.2\text{H}_2\text{O}$ : C 64.19, H 9.95, N 2.50; found: C 64.15, H 9.94; N 2.58.

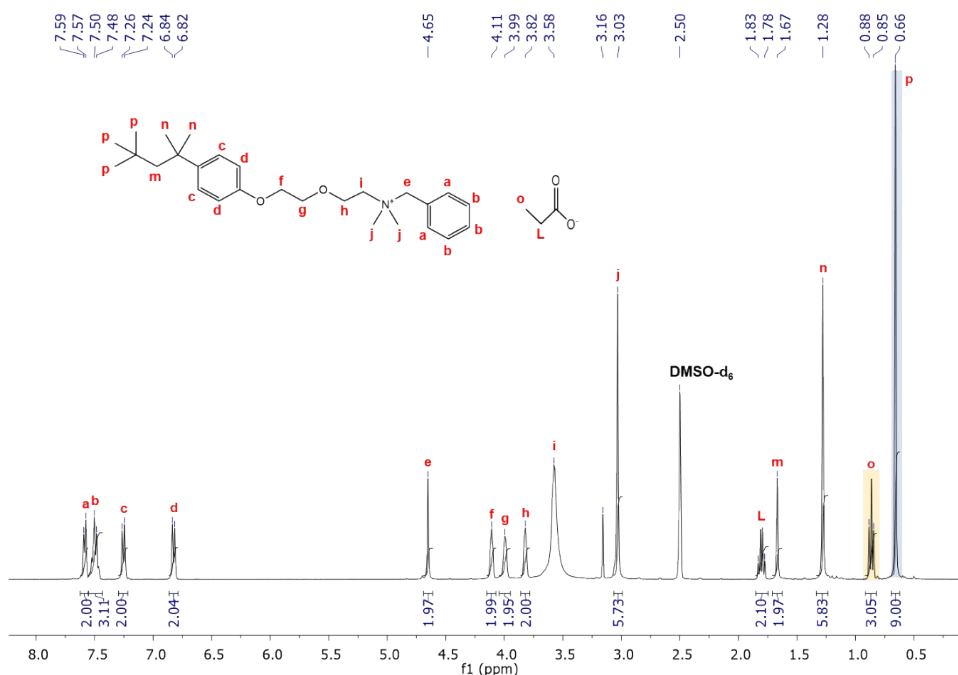

**SI-Figure 3.**  $^1\text{H}$  NMR (400.13 MHz, DMSO- $d_6$ , 25°C) of [BE][OPr].

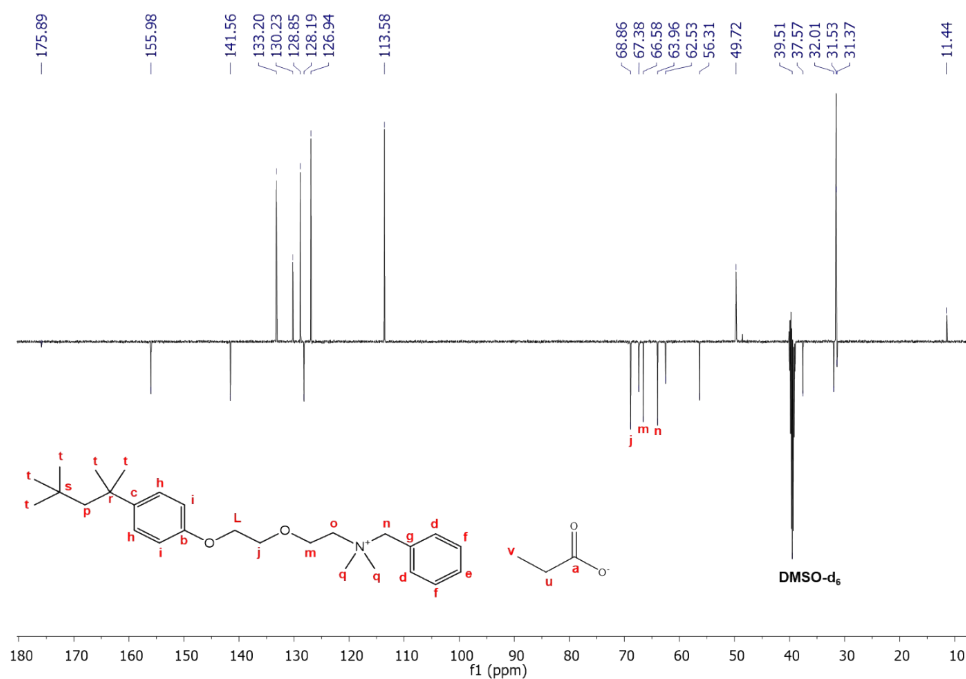

**SI-Figure 4.**  $^{13}\text{C}$  NMR APT (100.61 MHz, DMSO- $d_6$ , 25°C) of [BE][OPr].

**[BE][OHex]**: Yellow viscous liquid in quantitative yield (58.89 g, 100%).  $^1\text{H}$  NMR (400.13 MHz, DMSO- $d_6$ , 25°C)  $\delta$  = 7.59 (d,  $J$  = 7.2 Hz, 2H) 7.50 – 7.46 (m, 3H), 7.25 (d,  $J$  = 7.96 Hz, 2H), 6.83 (d,  $J$  = 7.88 Hz, 2H), 4.69-4.62 (m, 2H), 4.15-4.07 (m, 2H), 4.04-3.96 (m, 2H), 3.86-3.79 (m, 2H), 3.71-3.47 (m, 2H, overlap with  $\text{H}_2\text{O}$  signal), 3.04 (s, 6H), 1.81 (t,  $J$  = 7.38 Hz, 2H), 1.72-1.61 (m, 2H), 1.42 – 1.35 (m, 2H), 1.28 (s, 6H), 1.24 – 1.15 (m, 4H), 0.83 (t,  $J$  = 6.72 Hz, 3H), 0.71-0.62 (m, 9H) ppm.  $^{13}\text{C}$  NMR (APT) (100.61 MHz, DMSO- $d_6$ , 25°C)  $\delta$  = 175.3, 156.0, 141.6, 133.2, 130.2, 128.8, 128.2, 126.9, 113.6, 68.9, 67.4, 66.6, 64.0, 62.5, 56.3, 49.7, 37.6, 32.0, 31.8, 31.6, 26.3, 22.2, 14.1 ppm. Anal. Calcd (%) for  $\text{C}_{33}\text{H}_{53}\text{NO}_4 \cdot 4\text{H}_2\text{O}$ : C 66.08, H 10.25, N 2.34; found: C 65.93, H 10.40; N 2.42.

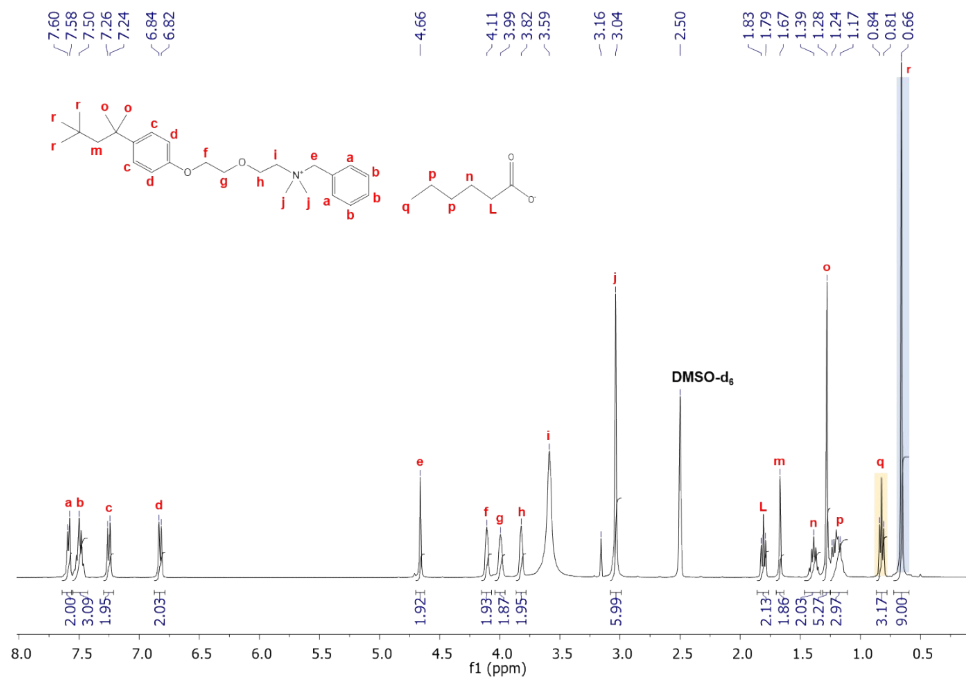

**SI-Figure 5.**  $^1\text{H}$  NMR (400.13 MHz, DMSO- $d_6$ , 25°C) of [BE][OHex].

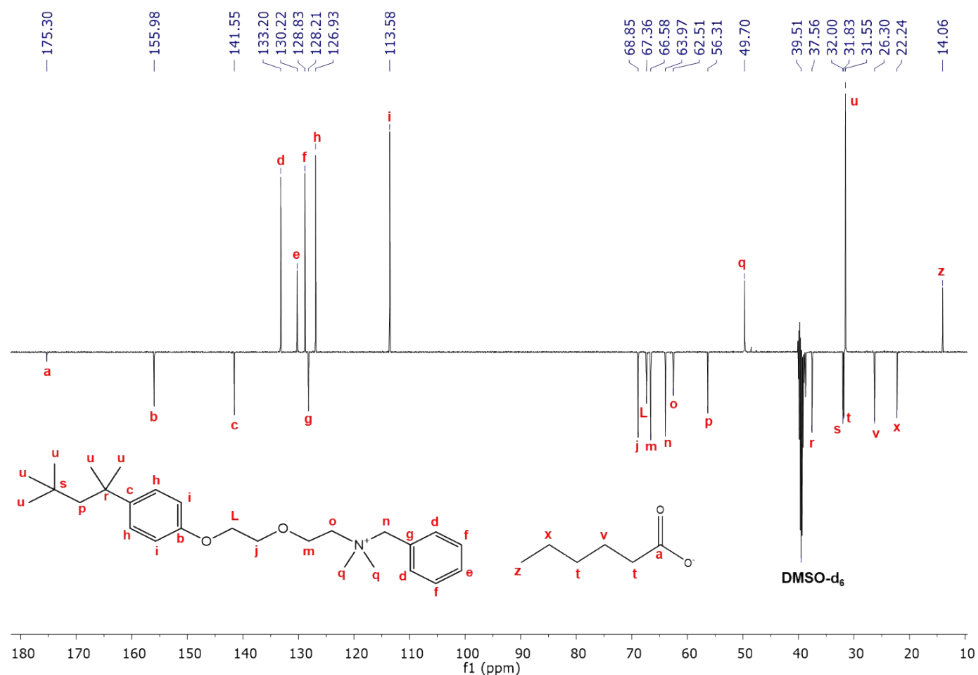

**SI-Figure 6.**  $^{13}\text{C}$  NMR APT (100.61 MHz, DMSO- $d_6$ , 25°C) of [BE][OHex].

**[DDA][OAc]**: Pale orange viscous liquid in quantitative yield (47.43 g, 100%).  $^1\text{H}$  NMR (400.13 MHz,  $\text{D}_2\text{O}$ ,  $25^\circ\text{C}$ )  $\delta$  = 3.28 – 3.12 (m, 4H), 3.04 (s, 6H), 1.85 (s, 3H), 1.70-1.51 (m, 4H), 1.40 – 1.14 (d, 28H), 0.91 – 0.89 (m, 6H) ppm.  $^{13}\text{C}$  NMR (APT) (100.61 MHz,  $\text{DMSO-d}_6$ ,  $25^\circ\text{C}$ )  $\delta$  = 180.1, 61.6, 52.0, 32.0, 29.6, 29.4, 29.1, 28.7, 25.5, 22.8, 22.6, 21.8, 13.8 ppm. Anal. Calcd (%) for  $\text{C}_{24}\text{H}_{51}\text{NO}_2 \cdot 3.5\text{H}_2\text{O}$ : C 64.22, H 13.07, N 3.12; found: C 64.24 H 13.03 N 3.12.

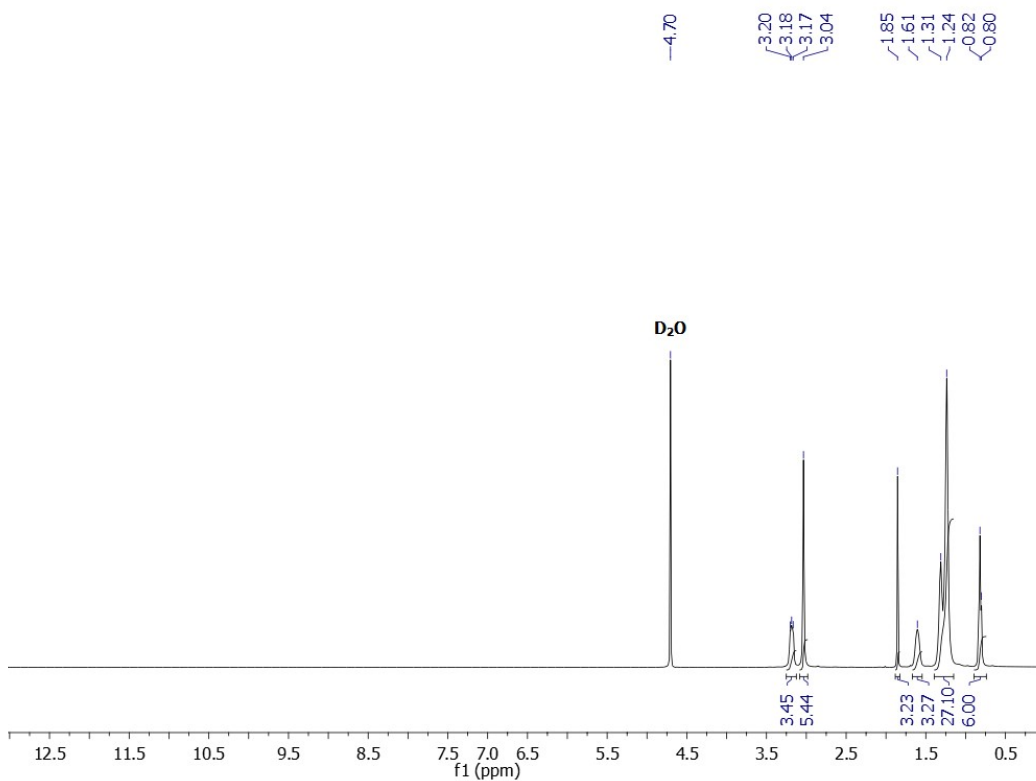

**SI-Figure 7.**  $^1\text{H}$  NMR (400.13 MHz,  $\text{D}_2\text{O}$ ,  $25^\circ\text{C}$ ) of [DDA][OAc].

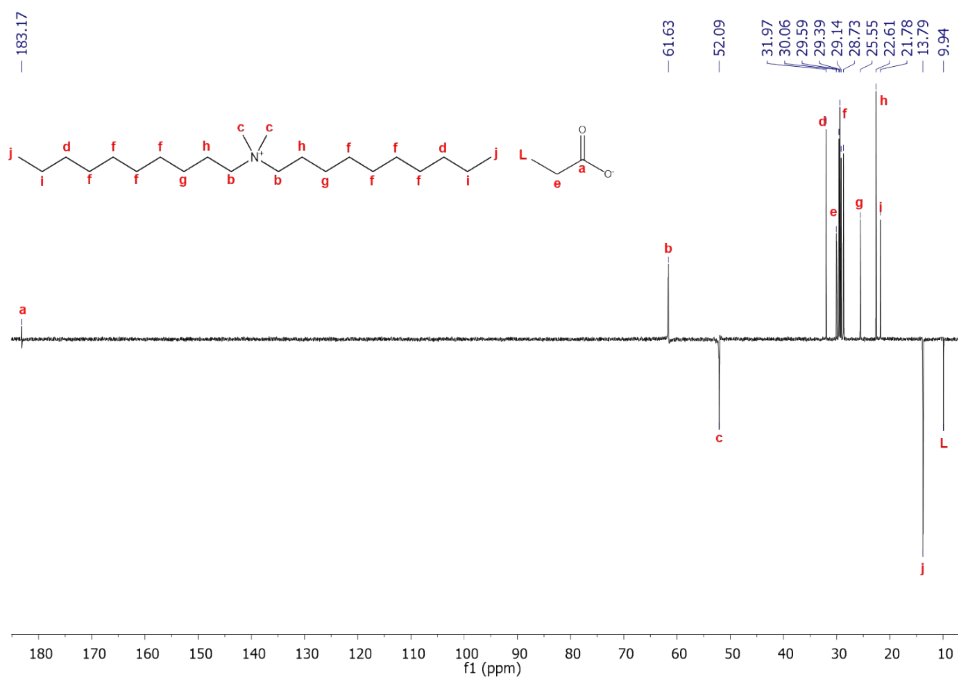

**SI-Figure 8.**  $^{13}\text{C}$  NMR APT (100.61 MHz,  $\text{D}_2\text{O}$ ,  $25^\circ\text{C}$ ) of [DDA][OAc].

**[DDA][OPr]**: Pale orange viscous liquid in quantitative yield (49.16 g, 100%).  $^1\text{H}$  NMR (400.13 MHz,  $\text{D}_2\text{O}$ ,  $25^\circ\text{C}$ )  $\delta$  = 3.32 – 3.21 (m, 4H), 3.12 (s, 6H), 2.27 – 2.16 (m, 2H), 1.76-1.61 (m, 4H), 1.47 – 1.21 (d, 28H), 1.07 (t,  $J$  = 7.60 Hz, 3H), 0.96 – 0.83 (m, 6H) ppm.  $^{13}\text{C}$  NMR (ATP) (100.61 MHz,  $\text{DMSO-d}_6$ ,  $25^\circ\text{C}$ )  $\delta$  = 183.2, 61.6, 52.1 32.0, 30.1, 29.6, 29.4, 29.1, 28.7, 25.6, 22.6, 21.9, 13.8, 9.9 ppm. Anal. Calcd (%) for  $\text{C}_{25}\text{H}_{53}\text{NO}_2 \cdot 3.2\text{H}_2\text{O}$ : C 65.66 H 13.09 C3.06 found: C 65.66 H 13.11 N 3.05.

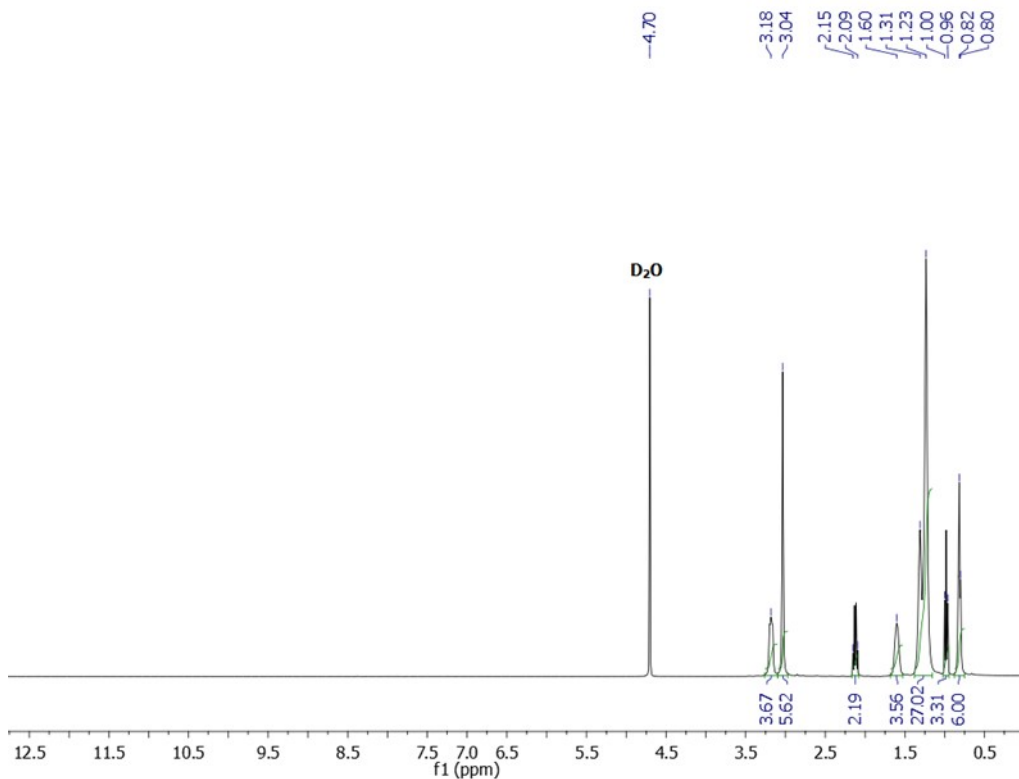

**SI-Figure 9.**  $^1\text{H}$  NMR (400.13 MHz,  $\text{D}_2\text{O}$ ,  $25^\circ\text{C}$ ) of [DDA][OPr].

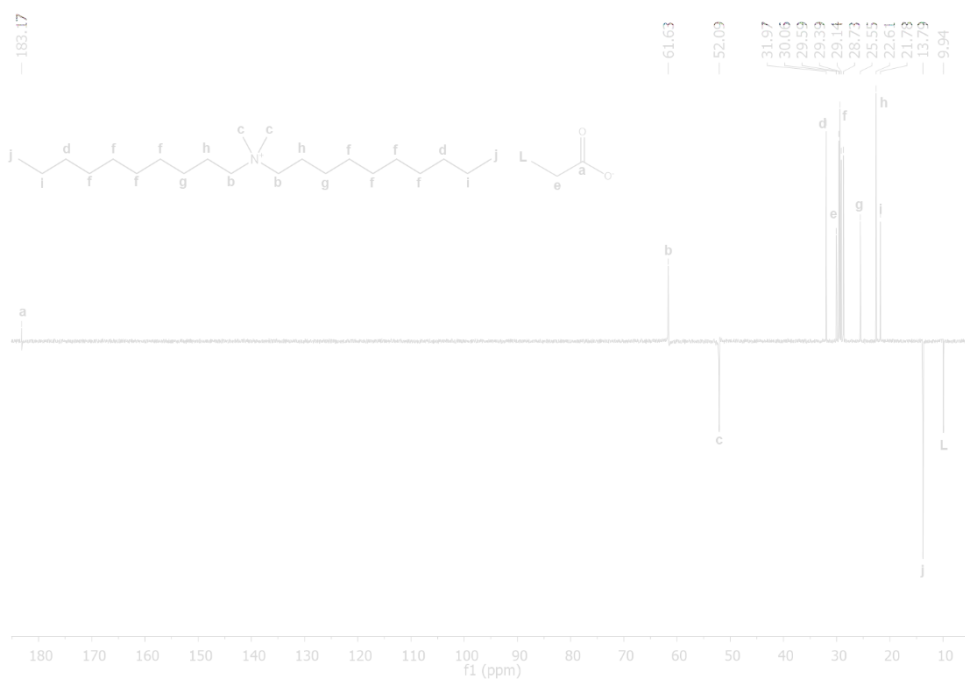

**SI-Figure 10.**  $^{13}\text{C}$  NMR APT (100.61 MHz,  $\text{D}_2\text{O}$ ,  $25^\circ\text{C}$ ) of [DDA][OPr].

**[DDA][OHex]**: Pale orange viscous liquid in quantitative yield (54.34 g, 100%).  $^1\text{H}$  NMR (400.13 MHz, DMSO- $d_6$ , 25°C)  $\delta$  = 3.29 – 3.18 (m, 4H), 3.00 (s, 6H), 1.77 (t,  $J$  = 7.38 Hz, 2H), 1.69-1.55 (m, 4H), 1.43 – 1.13 (m, 2H anion + 28H cation + 4H anion), 0.91 – 0.80 (m, 6H cation + 3H anion) ppm.  $^{13}\text{C}$  NMR (APT) (100.61 MHz, DMSO- $d_6$ , 25 °C)  $\delta$  = 174.9, 62.7, 49.9, 31.9, 31.3, 28.9, 28.8, 28.7, 28.5, 26.4, 25.8, 22.3, 22.1, 21.7, 14.1, 13.9 ppm. Anal. Calcd (%) for  $\text{C}_{28}\text{H}_{59}\text{NO}_2 \cdot 3.5\text{H}_2\text{O}$ : C 66.62, H13.18, N2.77; found C 66.68, H 13.48, N 2.77.

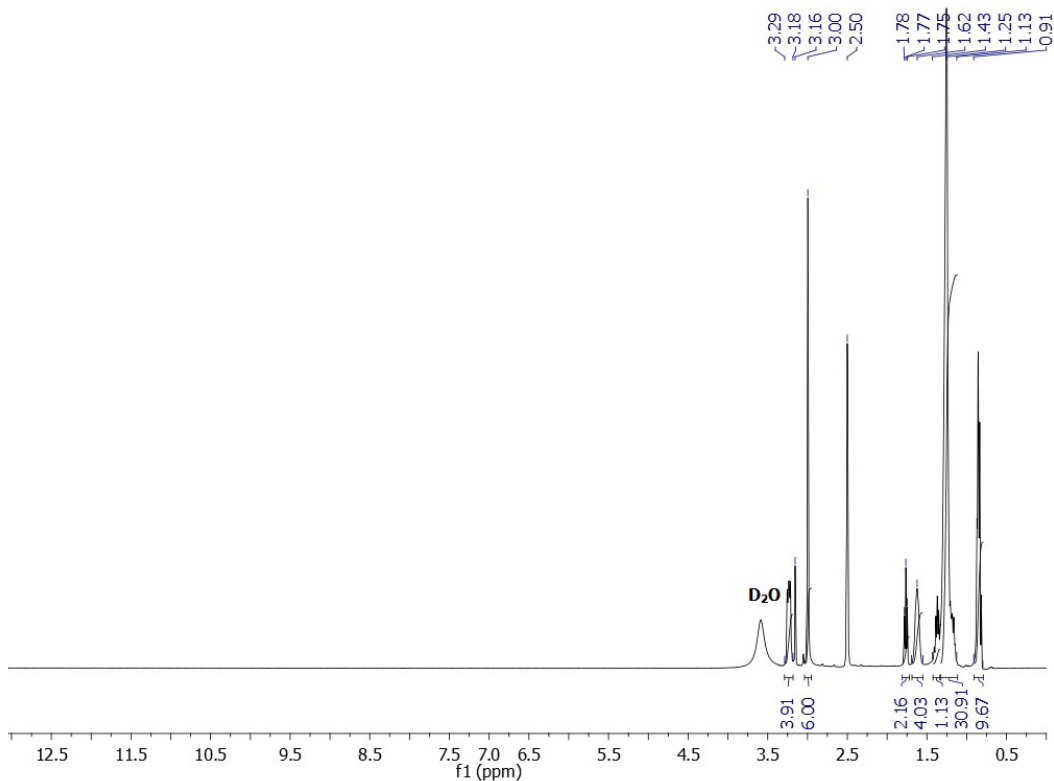

**SI-Figure 11.**  $^1\text{H}$  NMR (400.13 MHz, DMSO- $d_6$ , 25°C) of [BE][OHex].

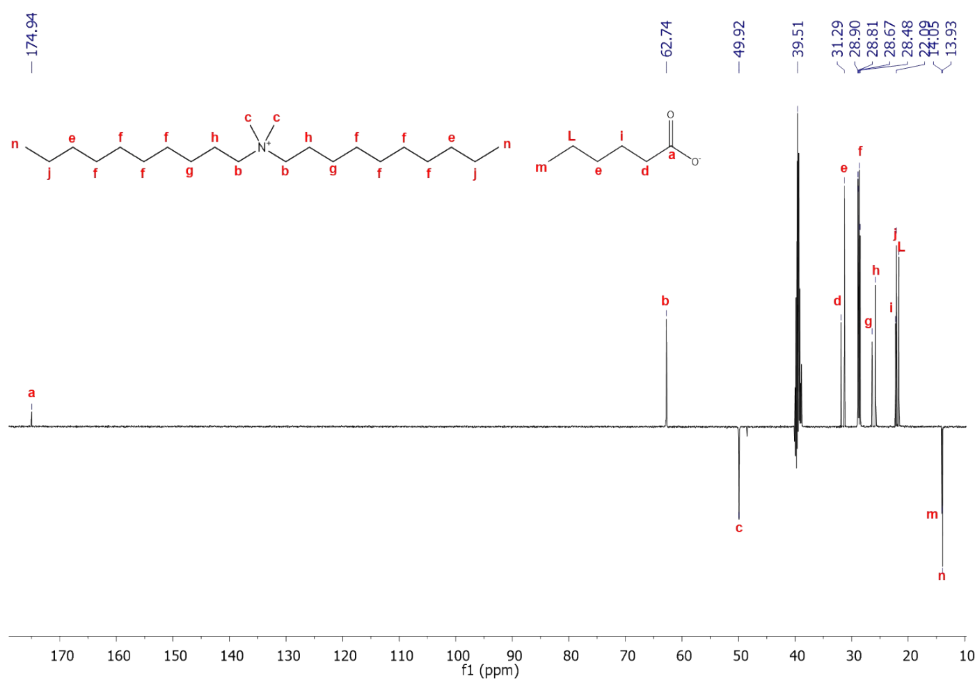

**SI-Figure 12.**  $^{13}\text{C}$  NMR APT (100.61 MHz, DMSO- $d_6$ , 25°C) of [BE][OHex].



## 2. ATR-FTIR spectroscopy

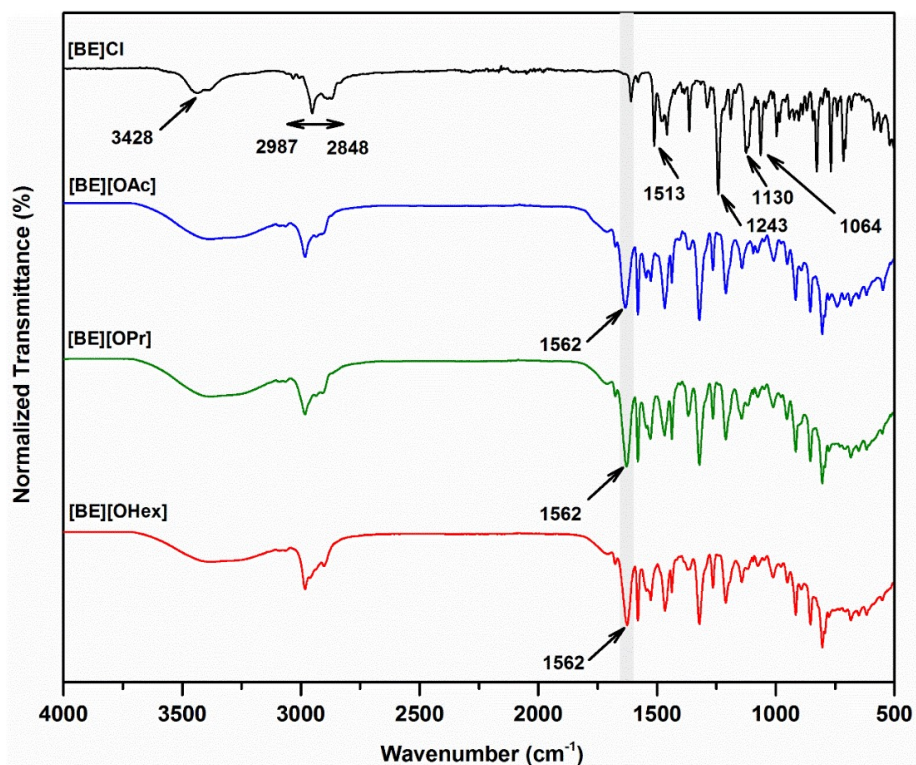

SI-Figure 13. FTIR-ATR spectra of [BE]Cl and [BE] based-ILs.

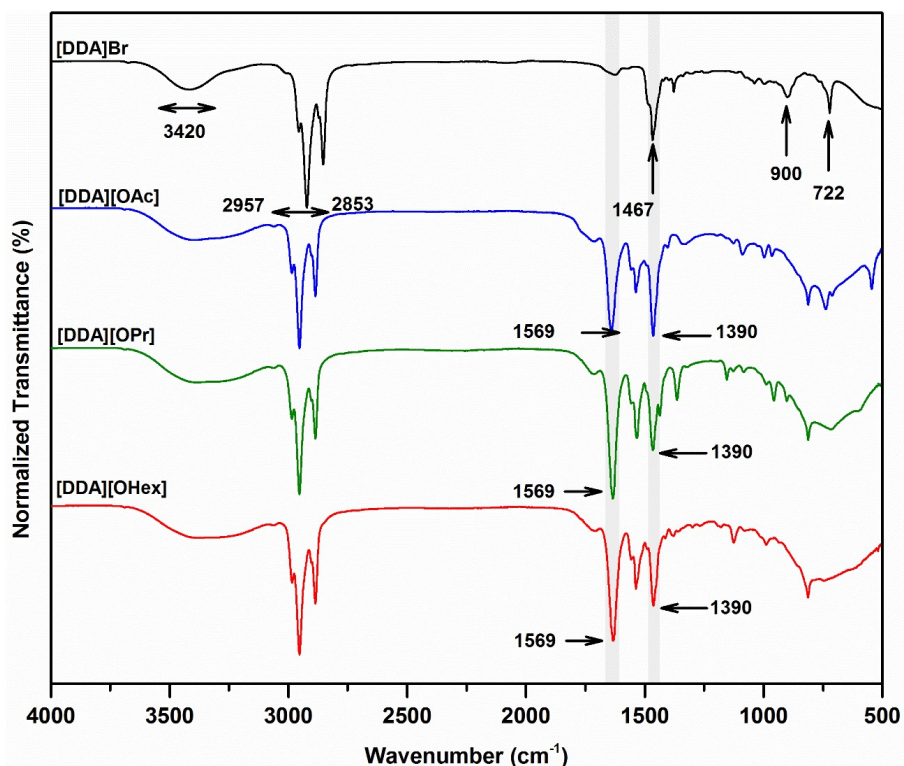

SI-Figure 14. FTIR-ATR spectra of [DDA]Br and [DDA] based-ILs.

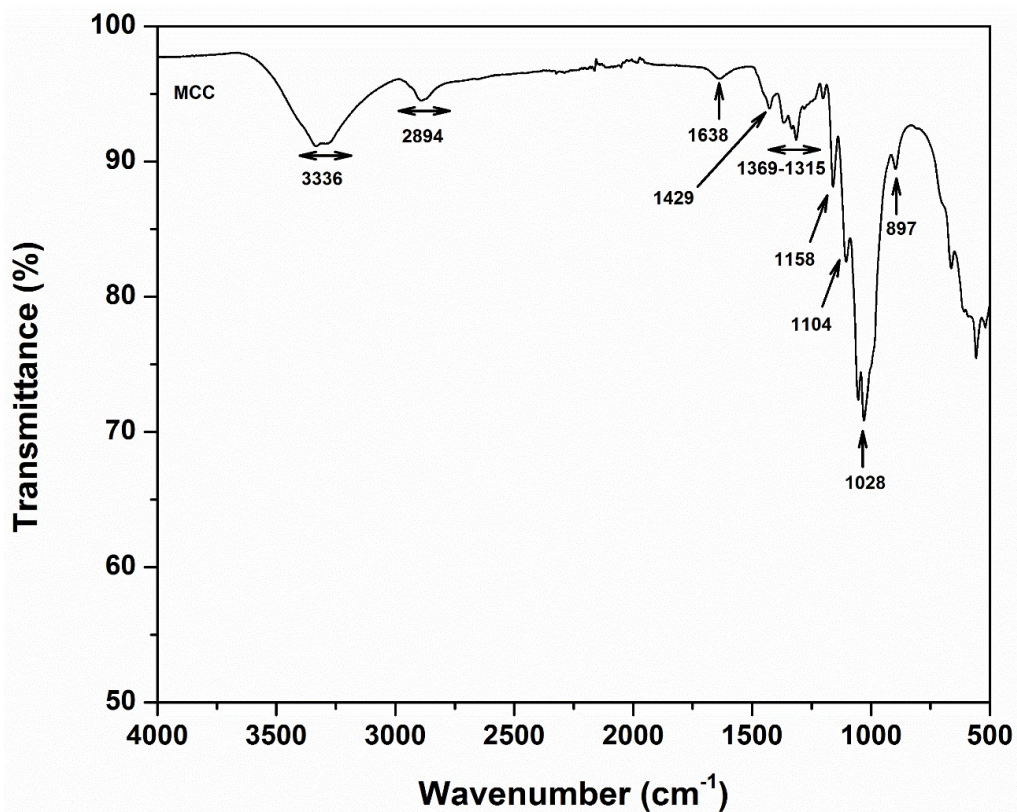

SI-Figure 15. FTIR-ATR spectra of microcrystalline (MCC).

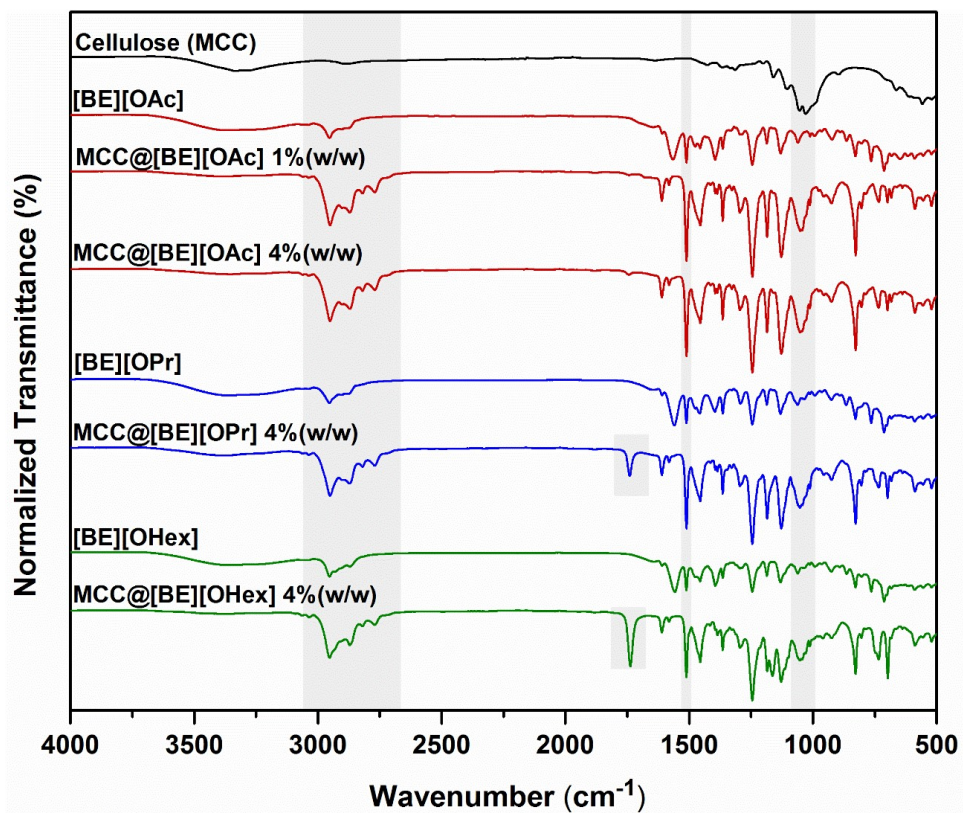

SI-Figure 16. FTIR-ATR spectra of microcrystalline cellulose (MCC) and the resulted polymeric structures prepared using [BE]-ILs as dissolution agents.



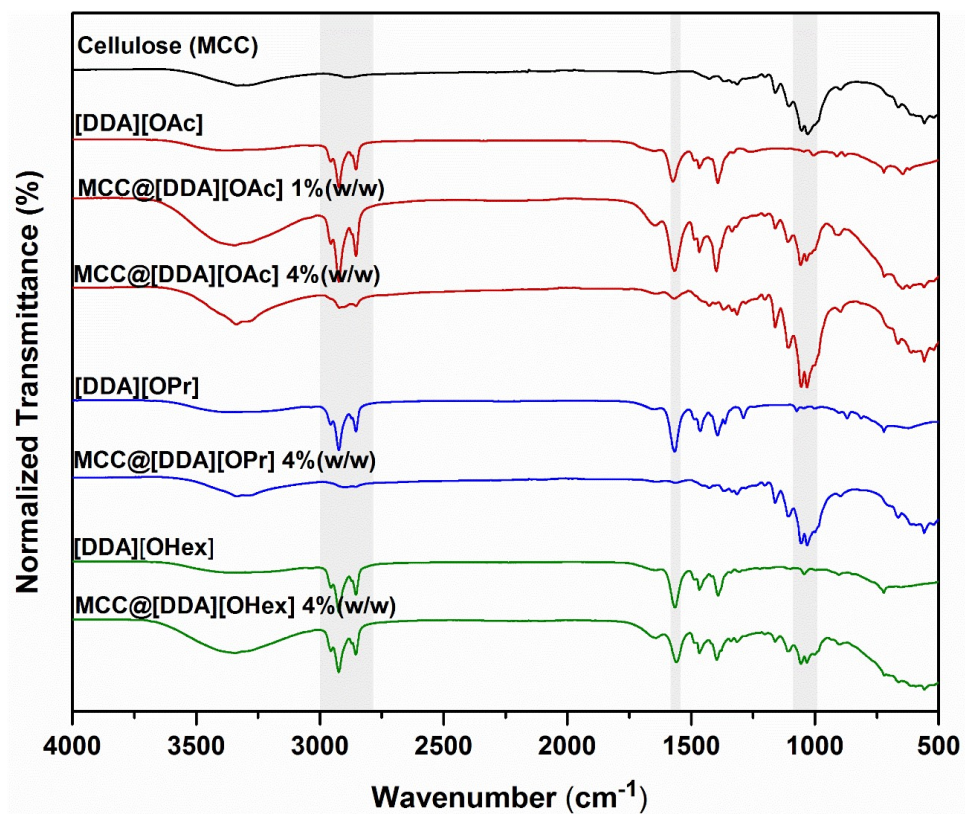

**SI-Figure 17.** FTIR-ATR spectra of microcrystalline cellulose (MCC) and the resulted polymeric structures prepared using [DDA]-ILs as dissolution agents.

### 3. Differential Scanning Calorimetry (DSC)

#### 3.1. Ionic Liquids (ILs)

The thermal properties namely glass transition ( $T_g$ ), melting ( $T_m$ ), crystallization ( $T_c$ ) and cold-crystallization ( $T_{cc}$ ) temperatures of [BE]- and [DDA]-based ILs are summarized in table 1.

**Table 1.** Thermal properties: glass transition ( $T_g$ ), melting ( $T_m$ ), crystallization ( $T_c$ ) and cold-crystallization ( $T_{cc}$ ) temperatures as well as thermal degradation temperatures ( $T_{d,5\%}$ -onset and  $T_{d, peak}$ ) of [BE]- and [DDA]-based ILs.

| IL          | DSC <sub>hydrated</sub> <sup>a</sup> |                       |                         | DSC <sub>dried</sub> <sup>b</sup> |                                                |                 |
|-------------|--------------------------------------|-----------------------|-------------------------|-----------------------------------|------------------------------------------------|-----------------|
|             | $T_{g-mid}$ (°C)                     | $T_c/T_m$ (°C)        | $T_{cc}$ (°C)           | $T_{g-mid}$ (°C)                  | $T_c/T_m$ (°C)                                 | $T_{cc}$ (°C)   |
| [BE]Cl      | -                                    | -162.4 <sup>d</sup>   | -                       | -                                 | -/-                                            | -               |
| [BE][OAc]   | -48.1                                | -/-                   | -                       | -14.4                             | -/-                                            | -               |
| [BE][OPr]   | -48.0                                | -/-                   | -                       | -14.7                             | -/-                                            | -               |
| [BE][OHex]  | -52.1                                | -2.5/2.4              | -                       | -29.1                             | -/-                                            | -               |
| [DDA]Br     | -73.7                                | -/11.7; 39.5;<br>83.4 | -21.4                   | -                                 | 36.8; 15.1; -2.7; -<br>14.7/<br>5.9;35.0; 68.6 | -               |
| [DDA][OAc]  | -79.7                                | -/36.5 <sup>e</sup>   | -                       | -61.6                             | -58.0/-38.4                                    | -               |
| [DDA][OPr]  | -78.9                                | -/29.4                | -                       | -69.1                             | 22.4/38.8                                      | -8.9            |
| [DDA][OHex] | -67.9                                | -/2.0                 | -55.0; -30.8; -<br>22.0 | -76.7                             | 6.9; -22.1/17.9; 39.0                          | -33.3; -<br>3.0 |

<sup>a</sup> 1st cycle scanned at 10°C min<sup>-1</sup> (hydrated state). <sup>b</sup> 3rd cycle scanned at 10°C min<sup>-1</sup> (dried state).

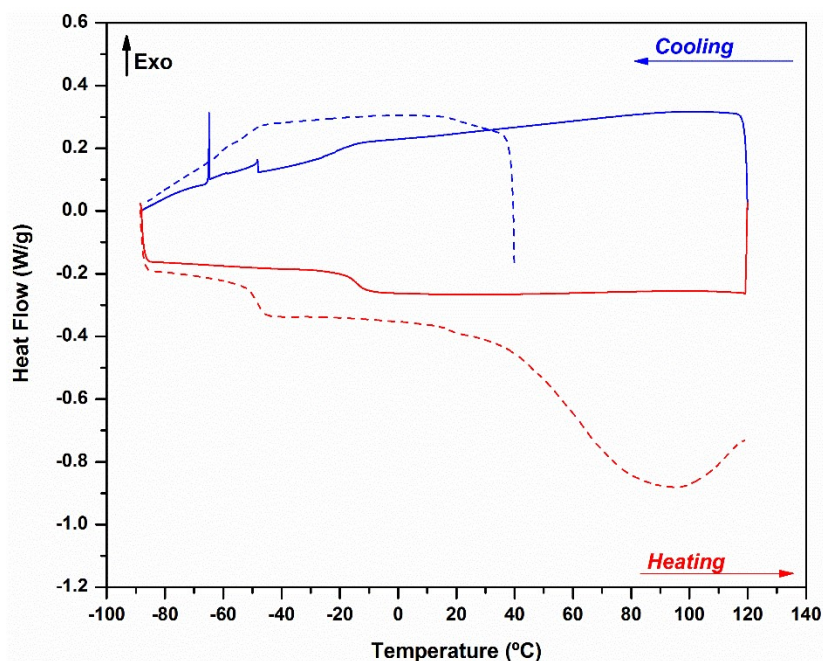

**SI-Figure 18.** Thermogram obtained by DSC experiment for [BE][OAc] at 10°C min<sup>-1</sup> as cooling and heating rate from -90 to 120°C. Solid line corresponds to the first cooling and subsequently, heating runs, and dashed cooling corresponds to the third cooling and subsequently, heating runs.

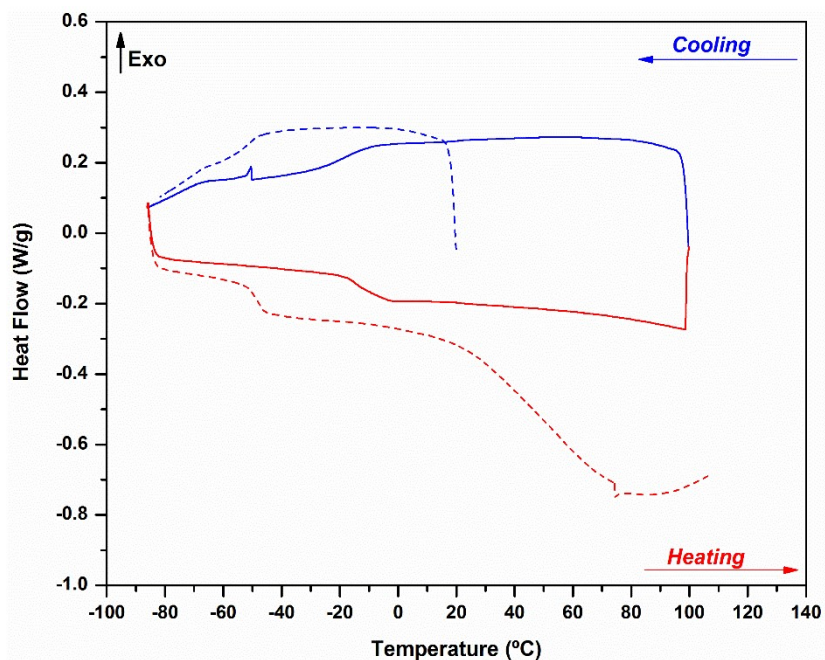

**SI-Figure 19.** Thermogram obtained by DSC experiment for [BE][OPr] at  $10^{\circ}\text{C min}^{-1}$  as cooling and heating rate from  $-90$  to  $110^{\circ}\text{C}$ . Solid line corresponds to the first cooling and subsequently, heating runs, and dashed cooling corresponds to the third cooling and subsequently, heating runs.

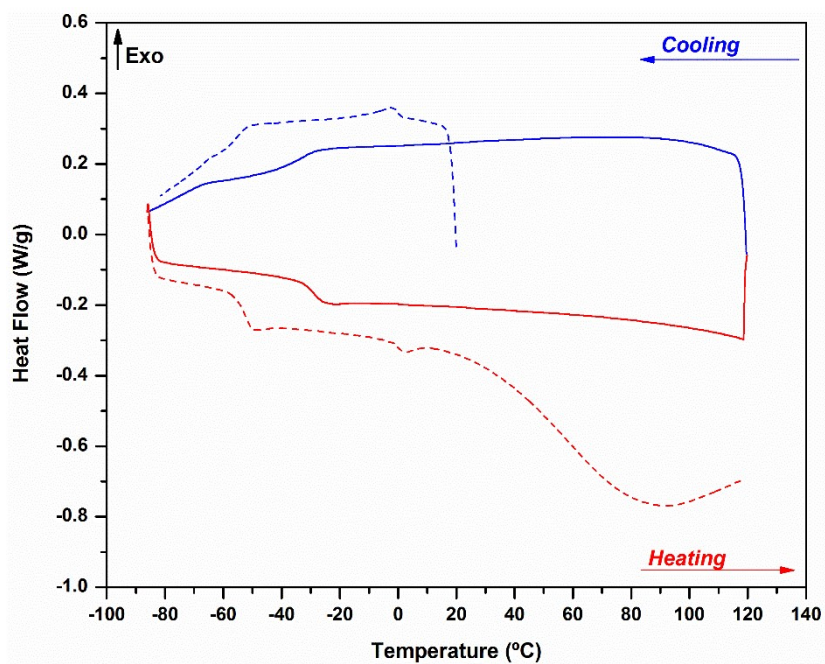

**SI-Figure 20.** Thermogram obtained by DSC experiment for [BE][Ohex] at  $10^{\circ}\text{C min}^{-1}$  as cooling and heating rate from  $-90$  to  $120^{\circ}\text{C}$ . Solid line corresponds to the first cooling and subsequently, heating runs, and dashed cooling corresponds to the third cooling and subsequently, heating runs.



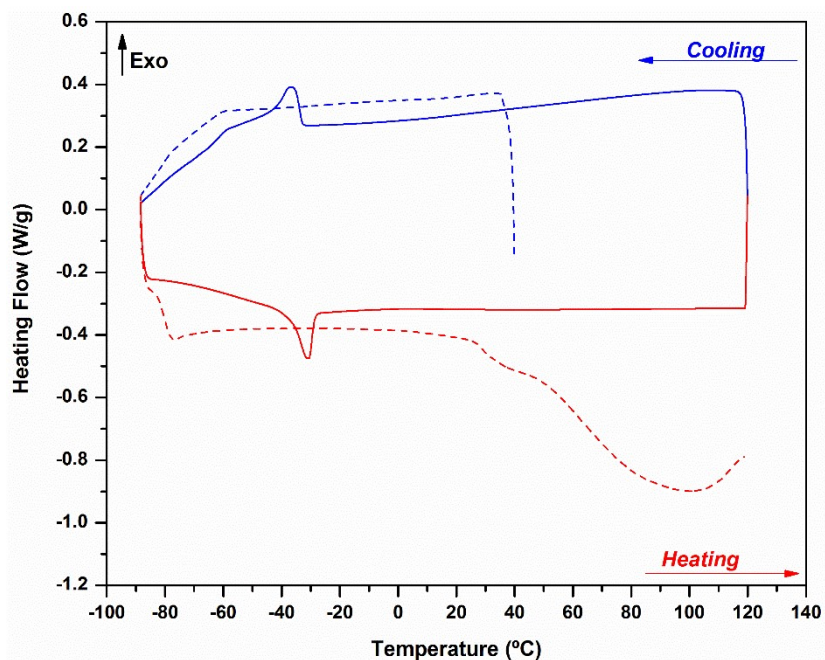

**SI-Figure 21.** Thermogram obtained by DSC experiment for [DDA][OAc] at  $10^{\circ}\text{C min}^{-1}$  as cooling and heating rate from  $-90$  to  $120^{\circ}\text{C}$ . Solid line corresponds to the first cooling and subsequently, heating runs, and dashed cooling corresponds to the third cooling and subsequently, heating runs.

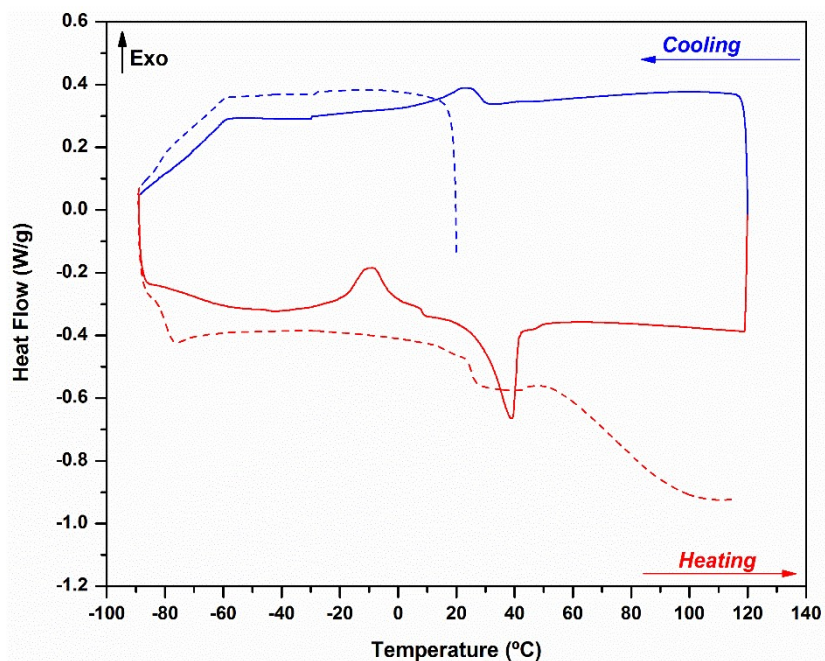

**SI-Figure 22.** Thermogram obtained by DSC experiment for [DDA][OPr] at  $10^{\circ}\text{C min}^{-1}$  as cooling and heating rate from  $-90$  to  $120^{\circ}\text{C}$ . Solid line corresponds to the first cooling and subsequently, heating runs, and dashed cooling corresponds to the third cooling and subsequently, heating runs.

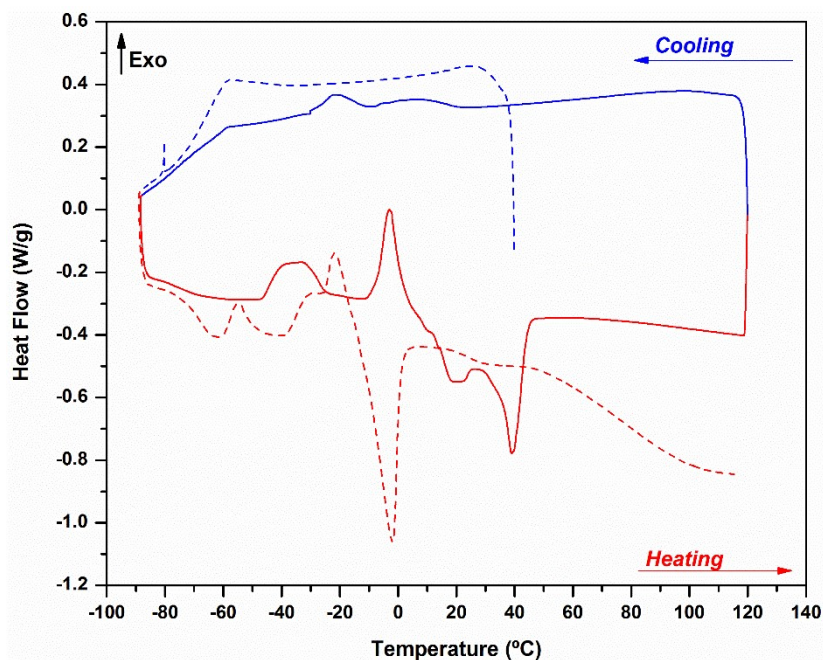

**SI-Figure 23.** Thermogram obtained by DSC experiment for [DDA][OHex] at  $10^{\circ}\text{C min}^{-1}$  as cooling and heating rate from  $-90$  to  $120^{\circ}\text{C}$ . Solid line corresponds to the first cooling and subsequently, heating runs, and dashed cooling corresponds to the third cooling and subsequently, heating runs.

### 3.2. Polymeric Structures

The thermal properties namely glass transition ( $T_g$ ), melting ( $T_m$ ), crystallization ( $T_c$ ) and cold-crystallization ( $T_{cc}$ ) temperatures as well as thermal degradation temperatures ( $T_{d,5\%-\text{onset}}$  and  $T_{d, \text{peak}}$ ) of MCC, and the respective obtained polymeric structures are summarized in table 2.

**Table 2.** Thermal properties: glass transition ( $T_g$ ), melting ( $T_m$ ), crystallization ( $T_c$ ) and cold-crystallization ( $T_{cc}$ ) temperatures as well as thermal degradation temperatures ( $T_{d,5\%-\text{onset}}$  and  $T_{d, \text{peak}}$ ) of [BE]- and [DDA]-based ILs.

| Sample                   | DSC <sup>hydrated</sup> <sup>a</sup>      |                                  |                                 | DSC <sup>dried</sup> <sup>b</sup>         |                                  |                                 |
|--------------------------|-------------------------------------------|----------------------------------|---------------------------------|-------------------------------------------|----------------------------------|---------------------------------|
|                          | $T_{g-\text{mid}}$ ( $^{\circ}\text{C}$ ) | $T_c/T_m$ ( $^{\circ}\text{C}$ ) | $T_{cc}$ ( $^{\circ}\text{C}$ ) | $T_{g-\text{mid}}$ ( $^{\circ}\text{C}$ ) | $T_c/T_m$ ( $^{\circ}\text{C}$ ) | $T_{cc}$ ( $^{\circ}\text{C}$ ) |
| MCC                      | -                                         | -                                | -                               | -                                         | -                                | -                               |
| MCC@[BE][OAc] (1% w/w)   | -63.5                                     | -                                | -                               | -64.5                                     | -                                | -                               |
| MCC@[BE][OAc] (4% w/w)   | -65.3                                     | -                                | -                               | -66.0                                     | -                                | -                               |
| MCC@[BE][OPr] (4% w/w)   | -72.8                                     | -                                | -                               | -73.4                                     | -                                | -                               |
| MCC@[BE][OHex] (4% w/w)  | -                                         | -                                | -                               | -                                         | -                                | -                               |
| MCC@[DDA][OAc] (1% w/w)  | -                                         | -                                | -                               | -                                         | -                                | -                               |
| MCC@[DDA][OAc] (4% w/w)  | -                                         | -                                | -                               | -                                         | -                                | -                               |
| MCC@[DDA][OPr] (4% w/w)  | -                                         | -                                | -                               | -                                         | -                                | -                               |
| MCC@[DDA][OHex] (4% w/w) | -                                         | -31.3/-7.3                       | -                               | -64.6                                     | -13.6/-2.2; 39.2                 | 4.7                             |

<sup>a</sup> 1<sup>st</sup> cycle scanned at  $10^{\circ}\text{C min}^{-1}$  (hydrated state). <sup>b</sup> 3<sup>rd</sup> cycle scanned at  $10^{\circ}\text{C min}^{-1}$  (dried state).

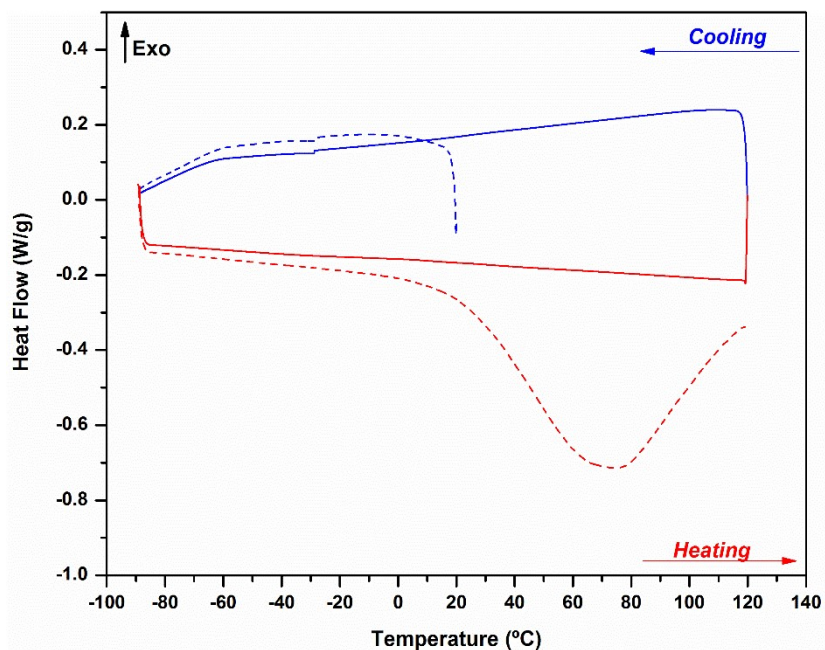

**SI-Figure 24.** Thermogram obtained by DSC experiment for cellulose microcrystalline (MCC) at  $10^{\circ}\text{C min}^{-1}$  as cooling and heating rate from  $-90$  to  $120^{\circ}\text{C}$ . Solid line corresponds to the first cooling and subsequently, heating runs, and dashed cooling corresponds to the third cooling and subsequently, heating runs.

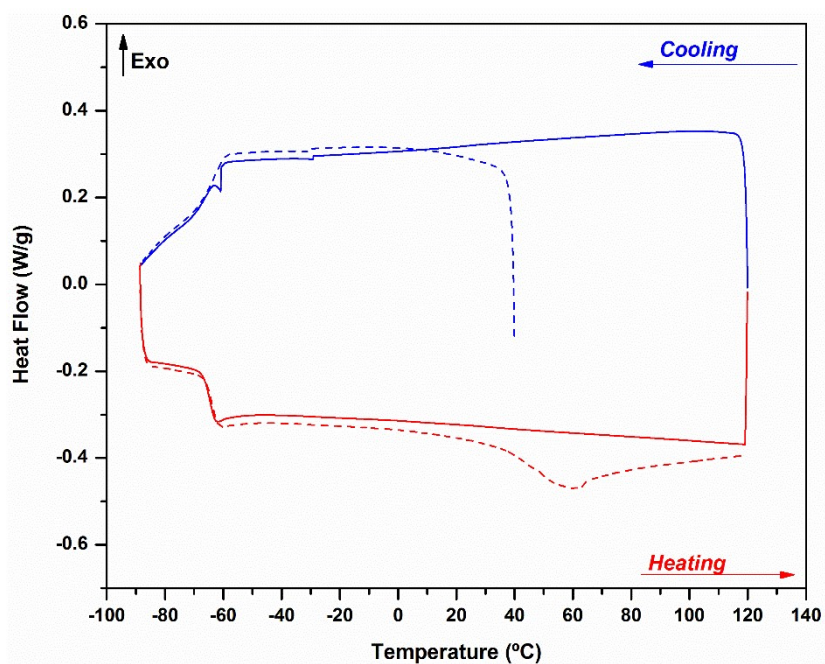

**SI-Figure 25.** Thermogram obtained by DSC experiment for MCC@[BE][OAc] (1% w/w) at  $10^{\circ}\text{C min}^{-1}$  as cooling and heating rate from  $-90$  to  $120^{\circ}\text{C}$ . Solid line corresponds to the first cooling and subsequently, heating runs, and dashed cooling corresponds to the third cooling and subsequently, heating runs.



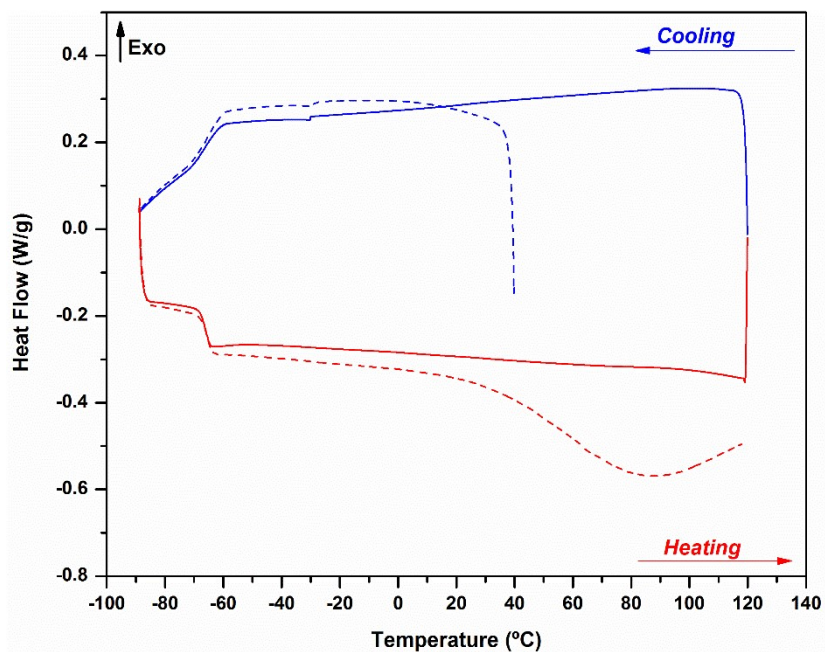

**SI-Figure 26.** Thermogram obtained by DSC experiment for MCC@[BE][OAc] (4% w/w) at  $10^{\circ}\text{C min}^{-1}$  as cooling and heating rate from  $-90$  to  $120^{\circ}\text{C}$ . Solid line corresponds to the first cooling and subsequently, heating runs, and dashed cooling corresponds to the third cooling and subsequently, heating runs.

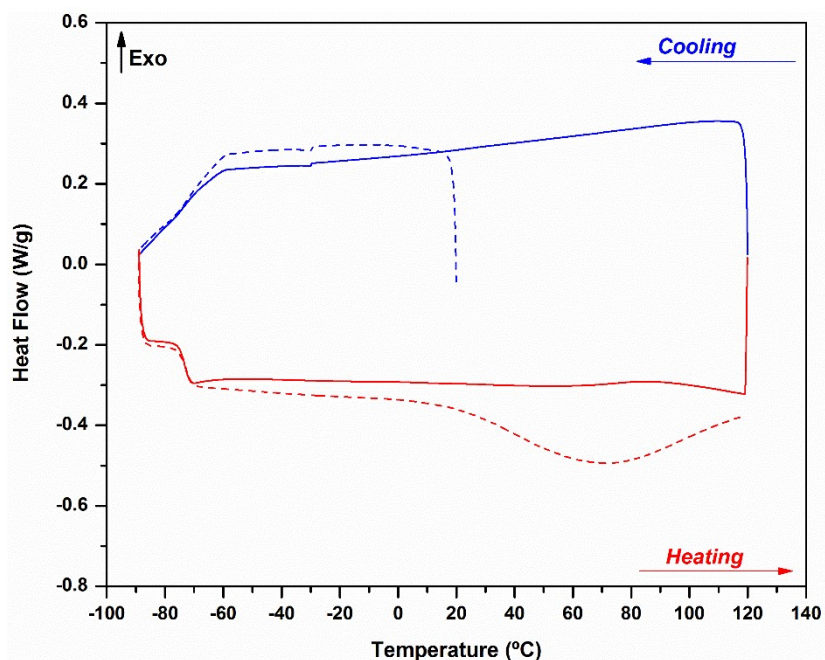

**SI-Figure 27.** Thermogram obtained by DSC experiment for MCC@[BE][OPr] (4% w/w) at  $10^{\circ}\text{C min}^{-1}$  as cooling and heating rate from  $-90$  to  $120^{\circ}\text{C}$ . Solid line corresponds to the first cooling and subsequently, heating runs, and dashed cooling corresponds to the third cooling and subsequently, heating runs.

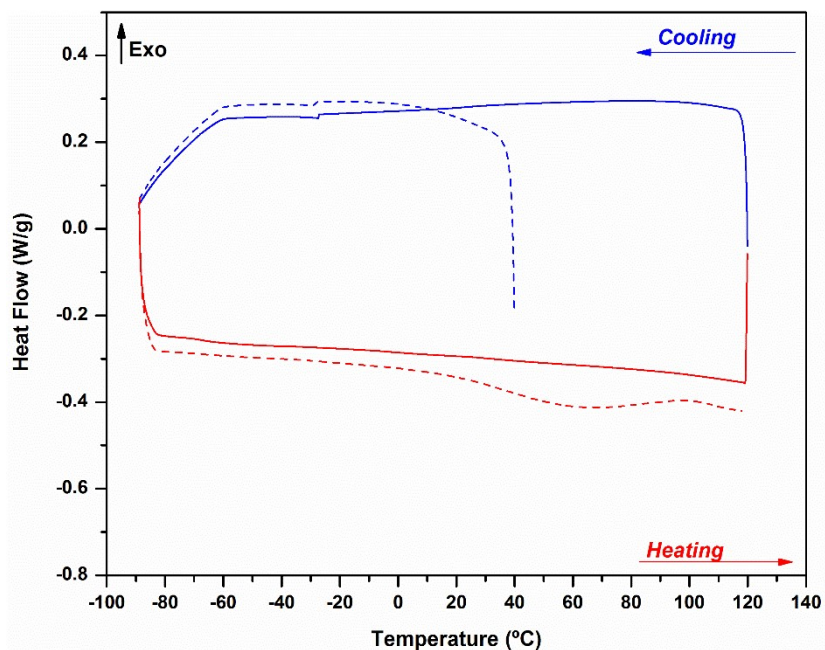

**SI-Figure 28.** Thermogram obtained by DSC experiment for MCC@[BE][OHex] (4% w/w) at  $10^{\circ}\text{C min}^{-1}$  as cooling and heating rate from  $-90$  to  $120^{\circ}\text{C}$ . Solid line corresponds to the first cooling and subsequently, heating runs, and dashed cooling corresponds to the third cooling and subsequently, heating runs.

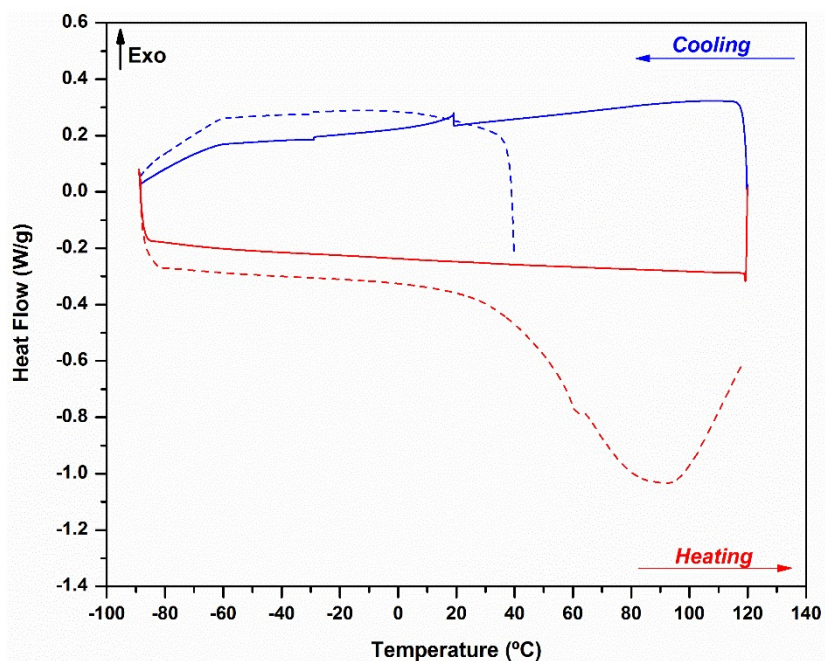

**SI-Figure 29.** Thermogram obtained by DSC experiment for MCC@[DDA][OAc] (1% w/w) at  $10^{\circ}\text{C min}^{-1}$  as cooling and heating rate from  $-90$  to  $120^{\circ}\text{C}$ . Solid line corresponds to the first cooling and subsequently, heating runs, and dashed cooling corresponds to the third cooling and subsequently, heating runs.

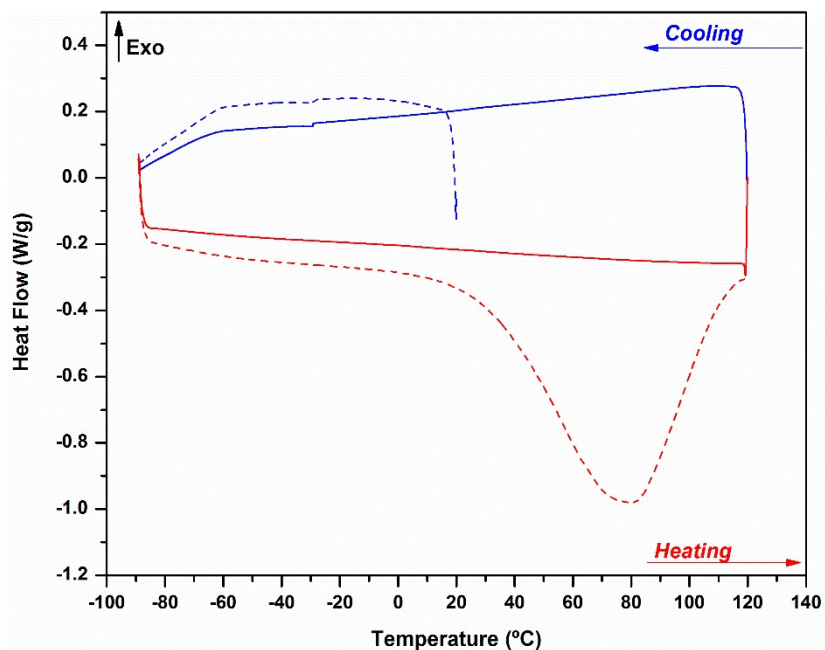

**SI-Figure 30.** Thermogram obtained by DSC experiment for MCC@[DDA][OAc] (4% w/w) at  $10^{\circ}\text{C min}^{-1}$  as cooling and heating rate from  $-90$  to  $120^{\circ}\text{C}$ . Solid line corresponds to the first cooling and subsequently, heating runs, and dashed cooling corresponds to the third cooling and subsequently, heating runs.

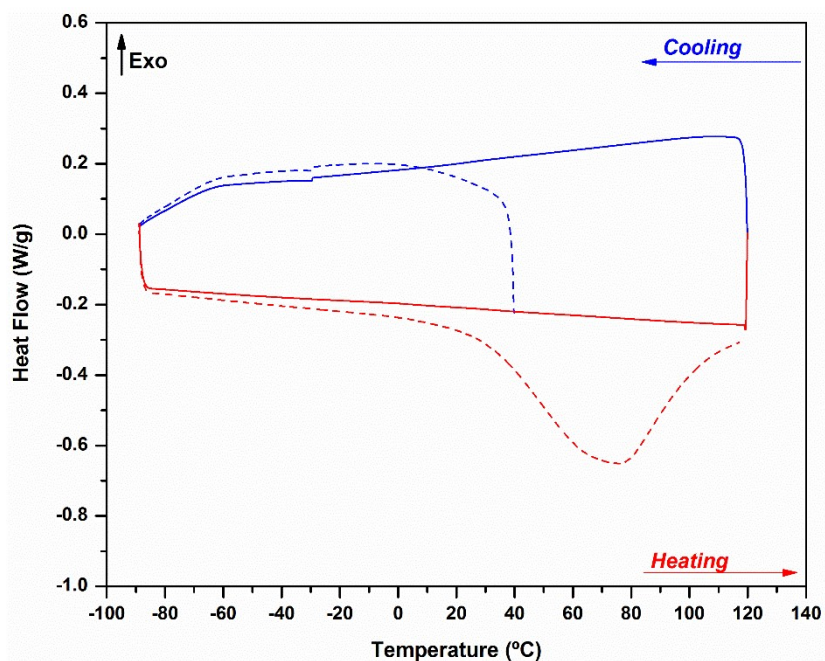

**SI-Figure 31.** Thermogram obtained by DSC experiment for MCC@[DDA][OPr] (4% w/w) at  $10^{\circ}\text{C min}^{-1}$  as cooling and heating rate from  $-90$  to  $120^{\circ}\text{C}$ . Solid line corresponds to the first cooling and subsequently, heating runs, and dashed cooling corresponds to the third cooling and subsequently, heating runs.



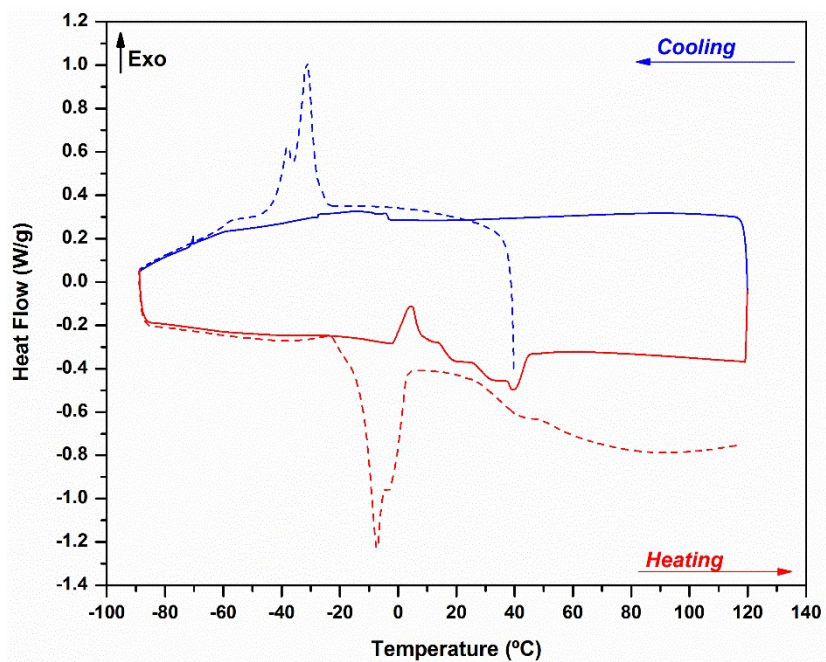

**SI-Figure 32.** Thermogram obtained by DSC experiment for MCC@[DDA][Ohex] (4% w/w) at  $10^{\circ}\text{C min}^{-1}$  as cooling and heating rate from  $-90$  to  $120^{\circ}\text{C}$ . Solid line corresponds to the first cooling and subsequently, heating runs, and dashed cooling corresponds to the third cooling and subsequently, heating runs.

## 4. Thermogravimetric Analysis

**Table 3.** Thermal degradation temperatures ( $T_{d,5\%-onset}$  and  $T_{d,peak}$ ) of starting chloride and bromide salts and ionic liquids.

| IL          | $T_{d,5\%-onset}$ (°C) <sup>a</sup> | $T_{d,peak}$ (°C) <sup>b</sup> |
|-------------|-------------------------------------|--------------------------------|
| [BE]Cl      | 189.0                               | 202.0                          |
| [BE][OAc]   | 146.6                               | 163.6                          |
| [BE][OPr]   | 128.7                               | 163.2                          |
| [BE][OHex]  | 144.7                               | 168.0                          |
| [DDA]Br     | 212.1                               | 247.3                          |
| [DDA][OAc]  | 128.6                               | 183.4                          |
| [DDA][OPr]  | 172.6                               | 184.8                          |
| [DDA][OHex] | 167.1                               | 187.0                          |

<sup>a</sup>  $T_{d,5\%-onset}$  – onset temperature where the sample lost 5% of initial weight; <sup>b</sup>  $T_{d,peak}$  – temperature associated with the first step of the mass loss process, which were taken as the minimum of the derivative of thermogravimetric curves (DTGA) was determined from simultaneous TGA-DSC experiments acquired from 25°C to 500°C at 10°C min<sup>-1</sup> under argon atmosphere.

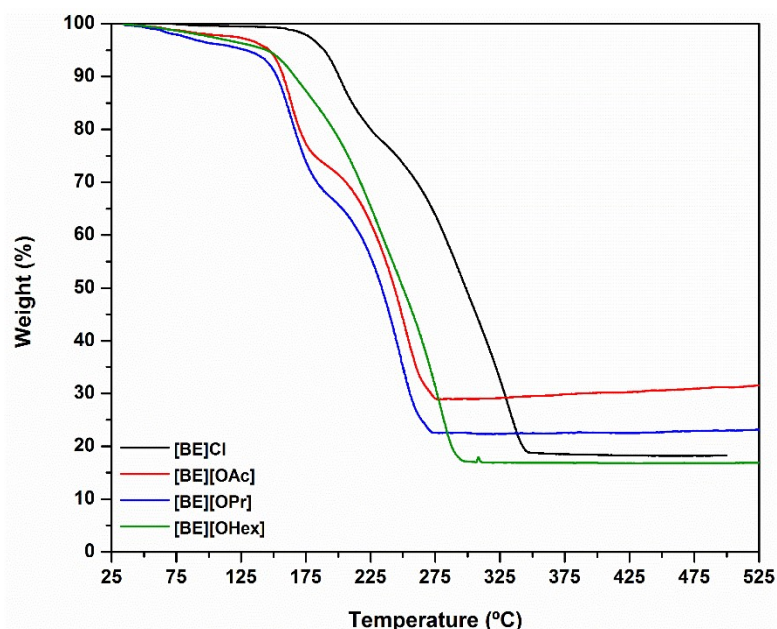

**SI-Figure 33.** Thermogravimetric curve obtained by Simultaneously TGA-DSC experiments for [BE]Cl and [BE] based-ILs at a heating rate of 10°C min<sup>-1</sup> from 25°C to 500-600°C under argon atmosphere.

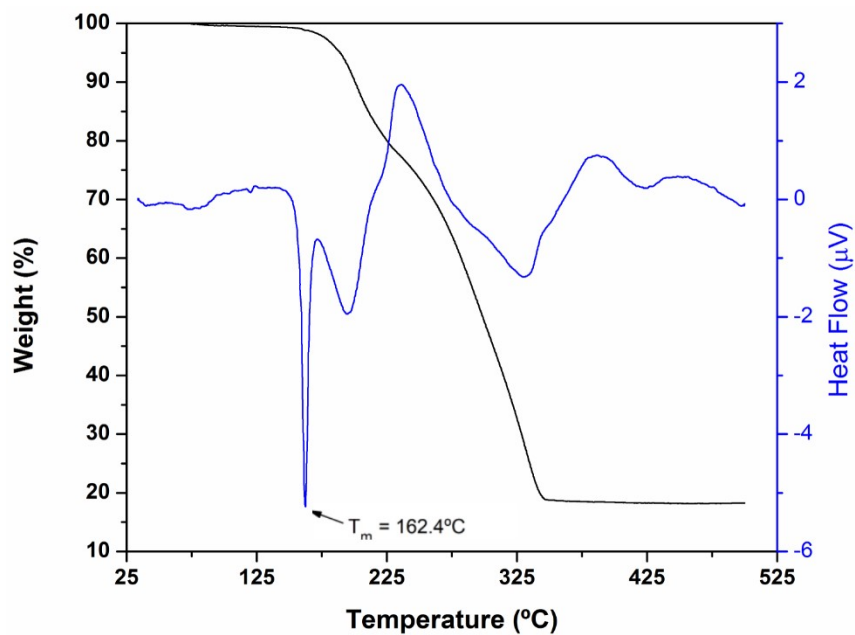

**SI-Figure 34.** Thermogravimetric curve and respective heat flow thermogram obtained by Simultaneously TGA-DSC experiments for [BE]Cl at a heating rate of 10°C min<sup>-1</sup> from 25°C to 500-600°C under argon atmosphere.

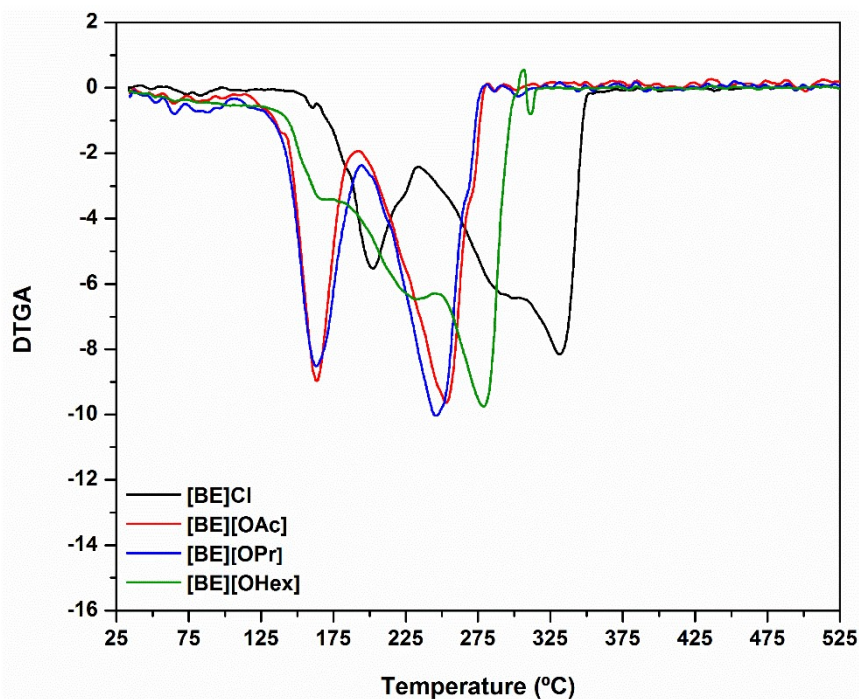

**SI-Figure 35.** Differential thermogravimetry curve calculated as the first derivative of the weight with respect to temperature for [BE]Cl and [BE] based-ILs at a heating rate of 10°C min<sup>-1</sup> from 25°C to 500-600°C under argon atmosphere.

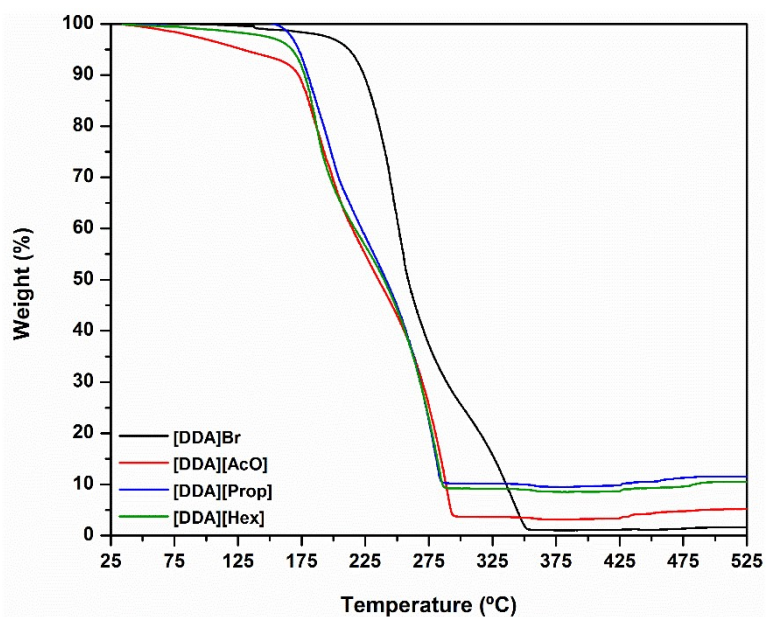

**SI-Figure 36.** Thermogravimetric curve obtained by Simultaneously TGA-DSC experiments for [DDA]Br and [DDA] based-ILs at a heating rate of  $10^{\circ}\text{C min}^{-1}$  from  $25^{\circ}\text{C}$  to  $600^{\circ}\text{C}$  under argon atmosphere.

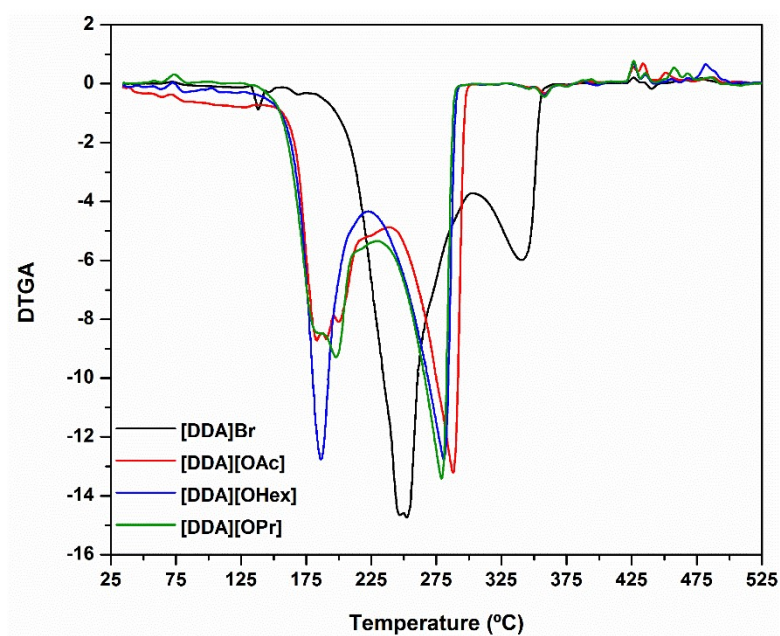

**SI-Figure 37.** Differential thermogravimetry curve calculated as the first derivative of the weight with respect to temperature for [DDA]Br and [DDA] based-ILs at a heating rate of  $10^{\circ}\text{C min}^{-1}$  from  $25^{\circ}\text{C}$  to  $600^{\circ}\text{C}$  under argon atmosphere.



**Table 4.** Thermal degradation temperatures ( $T_{d,5\%-onset}$  and  $T_{d,peak}$ ) of MCC and respective obtained polymeric structures.

| Sample                   | $T_{d,5\%-onset}$ (°C) <sup>a</sup> | $T_{d,peak}$ (°C) <sup>b</sup> |
|--------------------------|-------------------------------------|--------------------------------|
| MCC                      | 289.86                              | 331.90                         |
| MCC@[BE][OAc] (1% w/w)   | 217.32                              | 307.86                         |
| MCC@[BE][OAc] (4% w/w)   | 210.77                              | 306.08                         |
| MCC@[BE][OPr] (4 % w/w)  | 160.45                              | 298.85                         |
| MCC@[BE][OHex] (4% w/w)  | 168.95                              | 239.33                         |
| MCC@[DDA][OAc] (1 % w/w) | 94.74                               | 209.96                         |
| MCC@[DDA][OAc] (4 % w/w) | 194.61                              | 229.26                         |
| MCC@[DDA][OPr] (4 % w/w) | 192.19                              | 228.28                         |
| MCC@[DDA][OHex] (4% w/w) | 170.67                              | 202.65                         |

<sup>a</sup>  $T_{d,5\%-onset}$  – onset temperature where the sample lost 5% of initial weight; <sup>b</sup>  $T_{d,peak}$  – temperature associated with the first step of the mass loss process, which were taken as the minimum of the derivative of thermogravimetric curves (DTGA) was determined from simultaneous TGA-DSC experiments acquired from 25°C to 500°C at 10°C min<sup>-1</sup> under argon atmosphere.

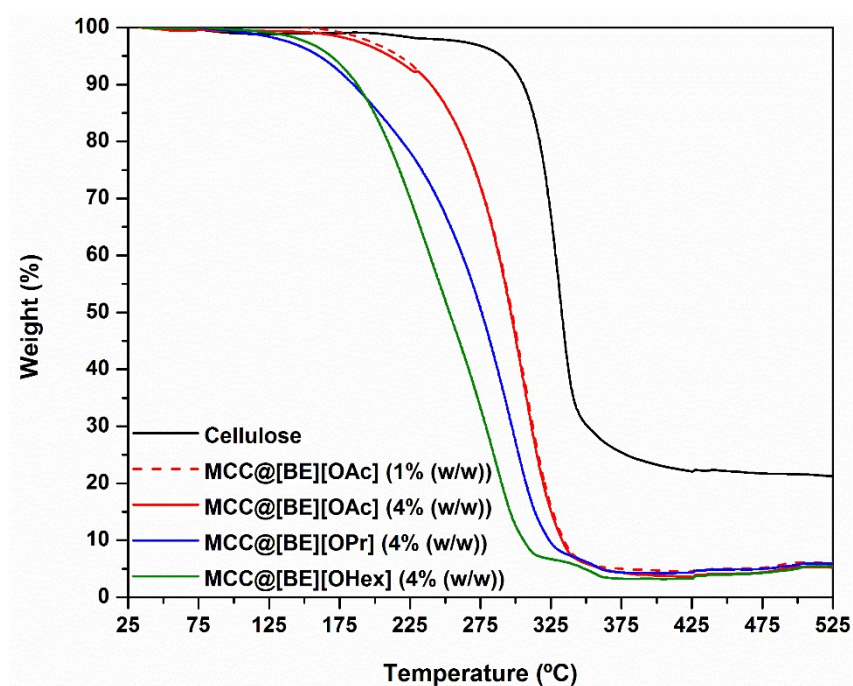

**SI-Figure 38.** Thermogravimetric curve obtained by Simultaneously TGA-DSC experiments for MCC and the polymeric structures obtained using [BE] based-ILs as dissolution agent at a heating rate of 10°C min<sup>-1</sup> from 25°C to 600°C under argon atmosphere.



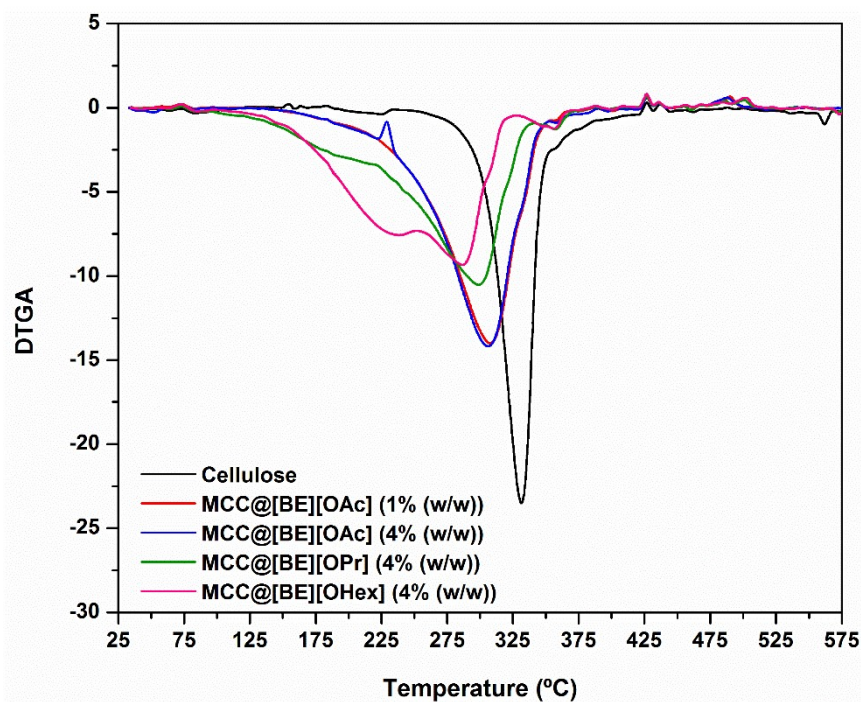

**SI-Figure 39.** Differential thermogravimetry curve calculated as the first derivative of the weight with respect to temperature Thermogravimetric curve obtained by Simultaneously TGA-DSC experiments for MCC and the polymeric structures obtained using [BE] based-ILs as dissolution agent at a heating rate of  $10^{\circ}\text{C min}^{-1}$  from  $25^{\circ}\text{C}$  to  $600^{\circ}\text{C}$  under argon atmosphere.

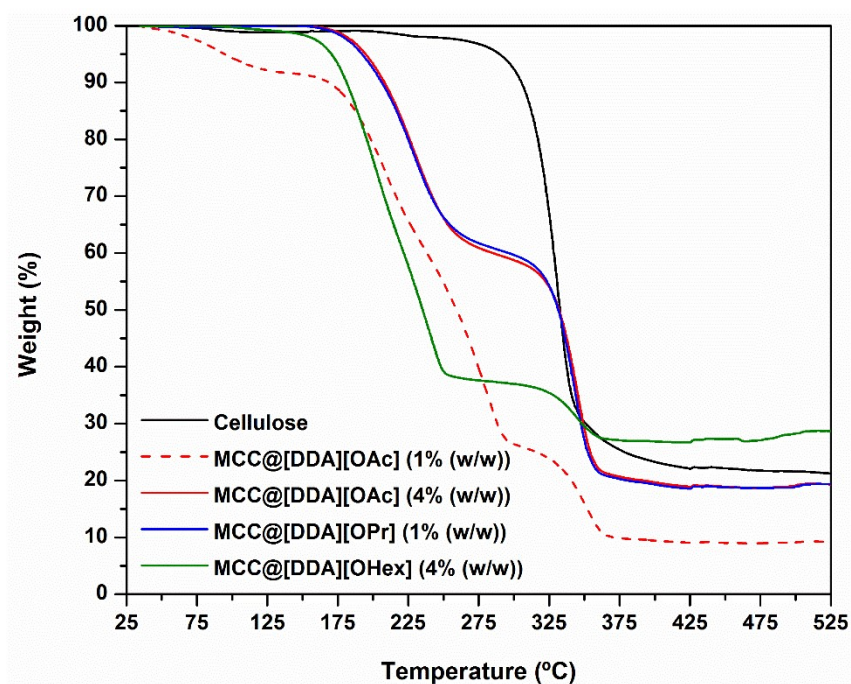

**SI-Figure 40.** Thermogravimetric curve obtained by Simultaneously TGA-DSC experiments for MCC and polymeric structures obtained using [DDA] based-ILs as dissolution agent at a heating rate of  $10^{\circ}\text{C min}^{-1}$  from  $25^{\circ}\text{C}$  to  $600^{\circ}\text{C}$  under argon atmosphere.

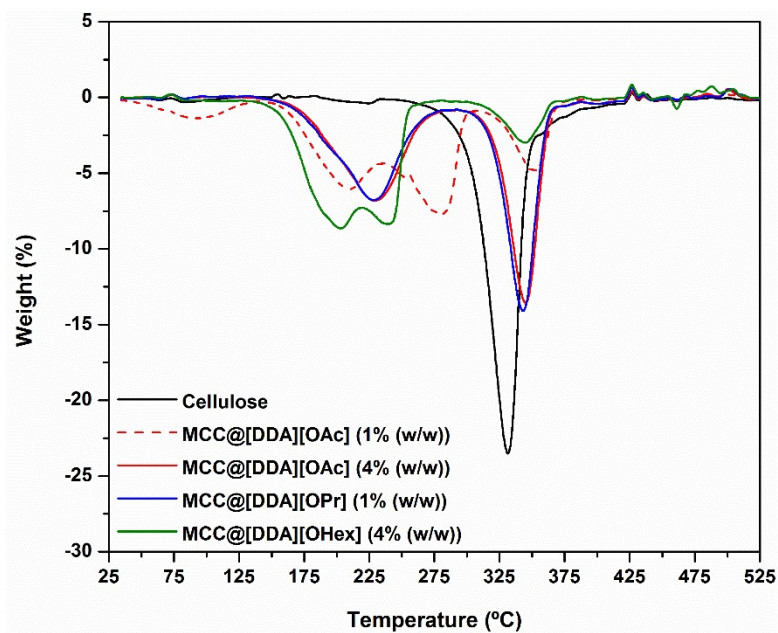

**SI-Figure 41.** Differential thermogravimetry curve calculated as the first derivative of the weight with respect to temperature Thermogravimetric curve obtained by Simultaneously TGA-DSC experiments for MCC and the polymeric structures obtained using [DDA] based-ILs as dissolution agent at a heating rate of  $10^{\circ}\text{C min}^{-1}$  from  $25^{\circ}\text{C}$  to  $600^{\circ}\text{C}$  under argon atmosphere.

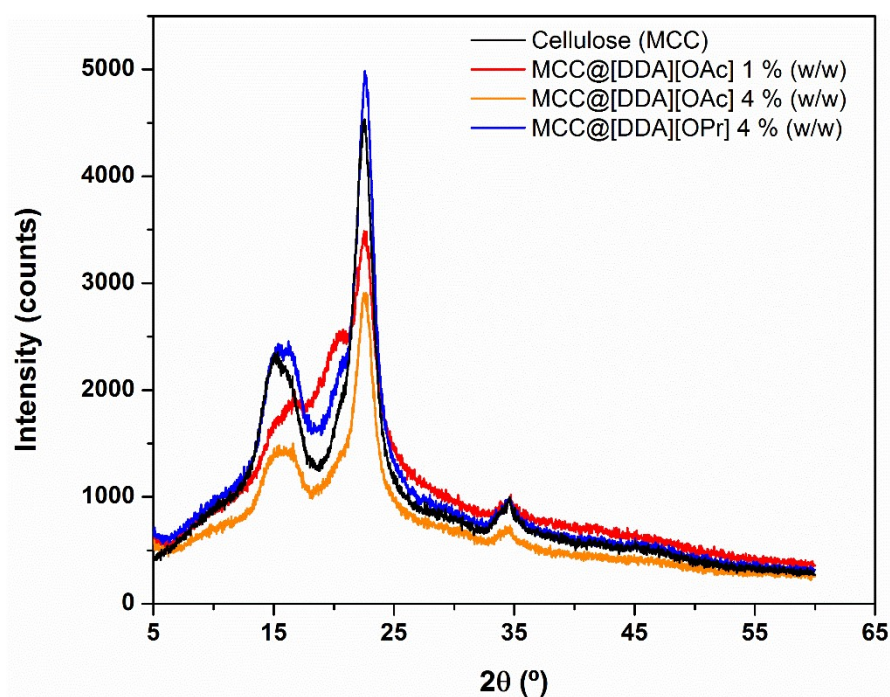

**SI-Figure 42.** X-ray diffraction spectra of MCC and the obtained films.
